# Supplementary material for: Impacts of exercise intervention on various diseases in rats
Source: PubMed Central journal article supplement — J Sport Health Sci. 2019 Oct 28;9(3):211–27. doi: 10.1016/j.jshs.2019.09.008 (PMC7242221; doi:10.1016/j.jshs.2019.09.008), 2019-10-28
Supplement: mmc3.pdf [file mmc3.pdf]

# Impacts of exercise intervention on different diseases in rats

## 运动干预对大鼠不同疾病的影响

WANG Ruwen<sup>1</sup>, TIAN Haili<sup>1</sup>, GUO Dandan<sup>1</sup>, TIAN Qianqian<sup>1</sup>, YAO Ting<sup>2</sup>, KONG Xingxing<sup>2</sup>

王汝雯<sup>1</sup>, 田海丽<sup>1</sup>, 郭丹丹<sup>1</sup>, 田倩倩<sup>1</sup>, 姚婷<sup>2</sup>, 孔星星<sup>2</sup>

(1. School of Kinesiology, Shanghai University of Sport, Shanghai 200438, China; 2. Division of Pediatric Endocrinology, Department of Pediatrics, UCLA Children's Discovery and Innovation Institute, David Geffen School of Medicine at UCLA, Los Angeles, CA 90095, USA)

(1. 上海体育学院运动科学学院, 上海, 200438;

2. 加州大学洛杉矶分校大卫·格芬医学院 加州大学洛杉矶分校儿童发现和创新研究所 儿科内分泌科, 洛杉矶, 加州 90095)

**Abstract** Background: Exercise is considered as an important intervention for treatment and prevention of several diseases such as osteoarthritis, obesity, hypertension, Alzheimer's disease. This review summarizes decadal exercise intervention studies with different rat models across 6 major systems to provide a better understanding of mechanisms behind effects that exercise brought. Methods: PubMed of NCBI was utilized as the data source. To collect research articles, we used the following terms to create the search: (((exercise [Title]) OR physical activity [Title]) OR training [Title]) AND (((rats [Title/Abstract]) OR rat [Title/Abstract]) OR rattus [Title/Abstract]). To best cover targeted studies, publication dates were limited to "within 10 years". The exercise intervention methods used for different diseases were sorted according to the mode, frequency and intensity of exercise. Results: The collected articles were categorized into studies related to 6 systems or disease types: the motor system (17 articles), metabolic system (110 articles), cardio-cerebral vascular system (171 articles), nervous system (71 articles), urinary system (2 articles), and cancer (21 articles). Our review found that, for different diseases, exercise intervention mostly had a positive effect. However, the most powerful effect was achieved by using a specific mode of exercise that addressed the characteristics of the disease. Conclusion: As a model animal, rats not only provide a convenient resource for studying human diseases but also provide the possibility for exploring the molecular mechanism of exercise intervention in diseases. This review also aims to provide exercise intervention frameworks and optimal exercise dose recommendations for further human exercise intervention research.

**Keywords** Disease; Exercise intervention; Method; Rats

**摘要** 背景: 运动是治疗和预防骨关节炎、肥胖、高血压、阿尔茨海默症等多种疾病的重要干预手段。本文总结了近10年来不同大鼠模型在六大系统中的运动干预研究,以期更好地了解运动的作用机制。方法:以NCBI的PubMed为数据源,检索语言为:(((exercise [Title]) OR physical activity [Title]) OR training [Title]) AND (((rats [Title/Abstract]) OR rat [Title

/Abstract]) OR rattus [Title/Abstract])。为了覆盖有针对性的研究,限制发表日期在“10年内”。根据运动方式、运动频率和运动强度对不同疾病的运动干预方法进行分类。结果:将检索到的文献分为6个系统或疾病类型:运动系统(17篇)、代谢系统(110篇)、心脑血管系统(171篇)、神经系统(71篇)、泌尿系统(2篇)以及癌症(21篇)。研究发现,对于不同的疾病,运动干预大多有积极的效果。然而,最有效的影响是通过使用针对疾病特征的具体运动方式实现的。结论:大鼠作为一种动物模型,不仅为研究人类疾病提供了便利的资源,而且为探索运动干预疾病的分子机制提供了可能。本综述旨在为人类运动干预研究提供框架和最佳运动量建议。

**关键词** 疾病; 运动干预; 方案; 大鼠

## 1 前言

近年来,运动作为一种治疗多种疾病的方法引起了许多研究者的关注。研究表明,适当的运动可有效预防慢性非传染性疾病<sup>[1,2]</sup>,并且在延缓疾病发展<sup>[3,4]</sup>、治疗代谢相关疾病、减少疾病并发症和降低疾病死亡率方面发挥重要作用<sup>[5]</sup>。然而,事实证明如果没有适当的运动处方,运动则有损身体健康,包括损害身体的免疫功能<sup>[6]</sup>和增加机体损伤的风险<sup>[7]</sup>。此外,过度运动可能使循环系统超负荷,导致急性肾衰竭、心脏骤停甚至脑血流中断<sup>[8,9]</sup>。

基于各种原因,目前大鼠是研究人类疾病最适合的动物模型之一。与小鼠相比,大鼠的体型更大,寿命更长且更易收集实验数据。同时,大鼠具有更强的抗病能力和适应性,因而更易繁殖。大鼠的认知功能与人类相似,研究者更容易获得足够多的具有特定疾病的大鼠模型,以全面研究运动对疾病的作用机制。例如,Castrogiovanni等人<sup>[10]</sup>应用骨关节炎大鼠模型的滑膜来确定中等身体活动对于相关抗炎和软骨保护生物标记表达的影响。

研究表明,运动的效果随运动类型、频率、强度和 大鼠模型 的改变而有所不同。众所周知,运动可以改善不同身体系统的状况,包括运动系统<sup>[10-12]</sup>、代谢系统<sup>[13-15]</sup>、心脑血管系统<sup>[16,17]</sup>、神经系统<sup>[17-19]</sup>和其他系统<sup>[20]</sup>。

## 2 方法

**2.1 数据收集** 以 NCBI 的 PubMed 为数据源,采用以下检索语言:(((exercise [Title]) OR physical activity [Title]) OR training [Title]) AND (((rats [Title/Abstract]) OR rat [Title/Abstract]) OR rattus [Title/Abstract])。使用 cancer、exercise 和 rat 这 3 个关键词分别检索与癌症相关的文献。为了覆盖有针对性的研究,我们设置了 2 个过滤器:将发表日期的范围定为 2008 年 1 月 1 日至 2018 年 12 月 31 日,共有 4596 篇;筛选出针对运动起干预作用而不是简单评估或能力测试的研究。最终有 392 篇文章入选。

**2.2 数据分析** 将收集到的文献以 6 个系统或疾病类型进行分类:运动系统(17 篇)、代谢系统(110 篇)、心脑血管系统(171 篇)、神经系统(71 篇)、泌尿系统(2 篇)和癌症(21 篇)。每个系统进一步细分为不同类型的疾病。本文描述了 4 种常见的运动方法——跑台运动、自主转轮、游泳和抗阻运动——比较分析不同的运动干预对各个系统的影响。附表中提供了有关运动方法的详细信息。

### 2.3 运动类型分类

**2.3.1 跑台运动** 跑台运动是大多数研究中一种常见的运动干预。跑台运动的优点是 通过人工调节速度或坡度以控制运动强度。例如,大鼠若不愿跑步,研究者会轻轻地戳其后腿,或给予低强度的电击。

在正式运动干预之前,大鼠通常被提前放置在跑台上,以熟悉跑台环境。在大多数研究中,大鼠每天以低强度递增速度跑 10 - 30 分钟。适应性训练结束后,在固定的时间内使用固定的运动强度进行正式干预。通过力竭实验确定大鼠的运动能力(该实验由测试期间获得的 4 个参数定义:最大摄氧量、最大血乳酸、最大速度和最大心率)。

本文定义的强度水平主要基于 4 个参数的组合。跑台运动强度由跑步速度和跑台坡度组成:低强度(<18 米/分钟;0% - 5% 坡度)、中等强度(18 - 25 米/分钟;0% - 10% 坡度)和高强度(> 25 米/分钟;≥ 0% 坡度)。

运动持续时间:实施训练方案中,多数大鼠每天跑 20 - 70 分钟,频率为每周 5 或 7 天。将 6 周定义为整个训练持续时间的临界点:短期训练持续少于 6 周,长

期训练持续 6 周或更长时间。将急性运动定义为大鼠以固定或递增的速度跑到力竭或以固定的持续时间和速度跑 1 次。

**2.3.2 自主转轮** 与跑台运动相比,自主转轮使大鼠可以在相对较低的强度下自由地跑步。在 Sprague - Dawley (SD) 大鼠中,选择自主转轮通常是为了将跑台潜在的有害影响降到最低<sup>[21]</sup>。我们可以监测大鼠在笼子中移动的距离。首次自主转轮,大鼠需要适应性训练以熟悉轮子环境。通常在正式实验之前,会将大鼠放在有轮子的笼子里适应 3 - 5 天。

与跑台运动相反,自主转轮的运动强度和持续时间不可控。因此,我们将运动持续时间分为短期(<6 周)和长期(≥6 周)。

**2.3.3 游泳** 游泳是大鼠最常用的运动干预之一。大鼠能够自然地游泳,而不会产生强烈抵抗<sup>[22]</sup>。为了在较短时间内确保运动强度,通常在大鼠尾巴上加负荷(占其体重的百分比)。在大鼠游泳之前,水需要被加热并保持在一定的温度(约 30°C)。大鼠游泳后应立即擦干。在正式实验之前,通常需要一周的适应性训练,并且每天的运动时间都在增加。

游泳强度由每日运动时间和负荷水平决定:低强度(20 - 59 分钟/天,0% - 3% 超负荷),中等强度(60 - 89 分钟/天,0% - 5% 超负荷)和高强度(≥90 分钟/天,≥0% 超负荷)。持续时间的标准同跑台运动。

**2.3.4 抗阻运动** 抗阻运动已被证实可以帮助运动员提高运动表现<sup>[23]</sup>。然而,在大鼠中,抗阻运动的使用频率低于其他 3 种干预方法。负重爬梯是抗阻运动常用的方法。其他抗阻训练方法包括:在蹲坐的大鼠身上使用电极刺激肌肉收缩以跳跃;让大鼠穿着重量可调的尼龙搭扣背心。

电极刺激强度由刺激时间决定。大多数研究使用 3 秒刺激 10 次收缩,收缩间隔为 7 秒。通常进行 5 组刺激,每组之间休息 3 分钟。爬梯或蹲坐的训练强度通常由完成的重复数和大鼠的负重来定义。爬梯或爬楼梯通常进行 8 - 12 次,负荷逐渐增加。蹲坐训练通常包括 5 组,每组重复 15 次,不同组间大鼠的尼龙搭扣背心重量不同。训练持续时间与跑台相同,以 6 周为临界点。

## 3 结果

**3.1 运动系统** 运动系统由骨骼、关节和骨骼肌 3 个部分组成。运动系统的主要功能是运动、支撑和保护<sup>[24]</sup>。骨骼支撑机体并为肌肉提供附着点,在神经支配作用下,肌肉收缩并牵拉附着的骨骼,以可移动的骨

关节为中心轴或支点,产生杠杆运动<sup>[25]</sup>。若运动系统受损,则骨骼、关节、肌肉和/或肌腱将受到影响,相应的临床体征和系统也将受影响。

3.1.1 肌萎缩 不同的生理—病理性刺激,包括由肌肉本身疾患或神经系统功能障碍都可以引起肌萎缩。肌萎缩是指由于肌蛋白降解增加及合成减少而导致的肌肉质量损失和肌肉功能损害<sup>[26-28]</sup>。最近的一项研究表明转录因子干扰素调节因子4(IRF4)在棕色脂肪细胞中的过度表达,可在预防和治疗肌萎缩<sup>[29]</sup>和提高肌肉运动能力方面发挥重要作用。

与肌萎缩相关的大鼠研究常使用抗阻运动和游泳。其中跑台运动是在跑台上以低或中等强度进行急性或短期运动,速度为15-20米/分钟,坡度为0°或20°(附表1)。两项研究使用短期或长期抗阻运动作为训练方法<sup>[30,31]</sup>,其中一项研究让大鼠倾斜80°攀登1米,所用重量按每只大鼠体重的百分比计算,并随体重50%的最大重量逐渐增加10%;另一项研究使大鼠攀升到最大承载能力的80%。所有动物接受5-6天的适应性训练,以适应攀登设备。此外,短期运动干预结合了低强度游泳和抗阻运动。

上述运动方案对于肌肉质量、纤维类型的重新分布和骨骼肌功能产生积极影响。有氧训练通过抑制泛素—蛋白酶体系统通过富含亮氨酸蛋白130/过氧化物酶体增殖物受体辅助激活因子1a(LRP130/PGC-1 $\alpha$ )复合物增强肌肉再生来实现;而抗阻运动通过雷帕霉素靶蛋白(mTOR)途径减弱地塞米松(DEX)诱导的肌肉萎缩,并略微增加肌肉特异性环指蛋白1蛋白水平<sup>[31]</sup>。

3.1.2 肌损伤 肌肉损伤是运动员和非运动员外科中最常见的疾病之一<sup>[32,33]</sup>,大多数损伤的原因是过度拉伸或肌腹部的直接损伤<sup>[34]</sup>。

本文的研究使用大鼠肌肉损伤模型,主要运动方案为跑台运动和抗阻运动。短期高强度训练是在跑台上以速度递增方式进行。速度范围为10-30米/分钟,坡度范围为5°-8°(附表2),训练方案是让所有大鼠以12米/分钟的速度每天跑10分钟,持续5天。在训练中,大鼠开始接受超负荷训练,最大自主等长收缩从60%逐渐增加到80%,一直保持到训练结束。对于抗阻运动的研究,大鼠在正式训练前熟悉爬梯3天(1.10 m  $\times$  0.18 m, 2 cm 栅格, 80°坡度),这些运动方案对肌肉再生和从缓慢/氧化表型中恢复产生积极作用。有研究提示在力量训练中,大鼠通过增加肌源性分化因子(MyoD)和肌源性因子5的mRNA水平促进骨骼肌再生<sup>[35]</sup>。

3.1.3 肌腱损伤 肌腱损伤是肌肉骨骼疾病的主要原因<sup>[36]</sup>。肌腱损伤状况可分为多种类型:肌腱交界处撕裂、肌腱中央部分撕裂、撕脱骨折、挫伤或劳损。当肌腱严重受损时,与肌腱相连的关节由于骨活动的丧失而不能伸展或弯曲,导致残疾<sup>[37]</sup>。

常用模型是衰老或手术诱导的肌腱损伤模型。主要采用跑台运动和抗阻运动,在跑台上进行短期低强度运动训练。在开始运动之前,让大鼠在跑台设备上进行1-2周适应性训练。通常使用长期抗阻运动的训练方法。负荷逐渐增加到最大、自主等长收缩的65%、85%、95%和100%。在不相邻的两天,大鼠在无负荷负重装置上适应攀爬垂直梯子(1.10 m  $\times$  0.18 m, 2 cm, 80°坡度)(附表3)<sup>[38]</sup>。

这些运动方案通常对肌腱损伤大鼠的肌腱重塑或肌腱损伤有积极的作用。有研究提示抗阻运动具有防止细胞外基质老化损失和减轻肌腱老化的潜在机制<sup>[38]</sup>。

3.1.4 骨质疏松症 骨质疏松症是一种进行性代谢性骨状况,其特征是骨量的严重丧失,伴随着结构的恶化,骨的脆性和骨折风险增加<sup>[39,40]</sup>。骨质疏松症常见于老年人,造成成骨细胞和破骨细胞的失衡<sup>[41]</sup>。随着时间的推移和年龄的增长,关节退行性改变增加。退行性关节疾病影响软组织和硬组织,包括软骨、软骨下骨和滑膜<sup>[42]</sup>。

在大鼠骨质疏松的研究中,运动干预的形式主要包括跑台运动、自主转轮和抗阻运动(跳跃运动)。在骨质疏松大鼠模型中,以固定速度25米/分钟,坡度10°,进行中等强度的长期跑台运动(附表4)。大鼠适应跑台1周,以15米/分钟、15%的等级进行5分钟的训练<sup>[45]</sup>。使用自主转轮运动长期干预老年骨质疏松症大鼠。另一种抗阻运动干预措施是跳跃训练。该方案把老鼠放在一个木箱里,使其每天20次跳跃。为期1周的适应性训练是在电刺激作用下,促使大鼠跳起来并用前肢抓住木箱上缘,爬上一块木板,然后重复此过程<sup>[46]</sup>。正式训练时,大鼠能够达到一放到箱子里就跳起来的水平。

以上运动训练方案可通过提高骨密度、减少骨丢失和维持骨质来预防骨量减少。然而,其中的潜在机制还有待于进一步研究。

3.1.5 骨关节炎(OA) 骨关节炎是影响关节最常见的疾病,其特征是软骨的进行性退化<sup>[43]</sup>。临床表现包括关节疼痛、功能丧失、触痛、活动受限、摩擦感、偶发性积液和不同程度的局部炎症。Pichler和Musumeci<sup>[47]</sup>证明了身体活动,特别是跑台和全身振动

训练,可以作为治疗骨关节炎等软骨疾病的一种治疗方法。此外,身体活动和含特级初榨橄榄油的饮食相结合可进一步改善早期骨关节炎的关节软骨恢复过程。另一项研究还表明,运动在预防骨关节炎和帮助保护关节软骨和整个关节方面发挥着重要作用<sup>[48]</sup>。

在骨关节炎大鼠模型中,以固定或递增速度进行中低强度的短期或长期训练,速度范围为10 - 30米/分钟,坡度为3° - 10°(附表5)。大鼠在正式运动训练前进行适应性训练。有两项研究表明大鼠在10米/分钟、每天10分钟,持续1周后已适应跑台<sup>[49,50]</sup>。这类研究多以跑台运动为主,辅以短期自主转轮。

跑台运动对于炎症和抑制与骨关节炎相关的软骨退变具有积极的作用。跑台运动通过抑制核转录因子(NF- $\kappa$ B)信号通路抑制碘乙酸钠诱导的骨关节炎加重<sup>[49]</sup>。自由运动可保护大鼠免受骨关节炎疼痛,但机制尚不清楚<sup>[51]</sup>。

**3.2 代谢系统** 分解与合成代谢是维持机体正常状态必不可少的两个过程,是代谢的主要组成部分。代谢紊乱导致很多疾病,包括肥胖、糖尿病和非酒精性脂肪肝(NAFLD)。研究表明运动对改善代谢紊乱有积极的作用<sup>[10,52]</sup>。Goodpaster和Spark的成果<sup>[53]</sup>将运动作为一种工具,研究肥胖和糖尿病中能量代谢的潜在机制,为本部分研究奠定了基础。

**3.2.1 肥胖** 肥胖增加了患癌症、2型糖尿病、抑郁症、心血管疾病和骨关节炎<sup>[54,55]</sup>等疾病的风险进而影响人的寿命和生活质量。诱导肥胖的因素有很多<sup>[56]</sup>,缺乏运动是其中之一。运动已成为治疗肥胖的重要方法之一。

在饮食诱导肥胖的大鼠模型中,已确定3种运动方法对肥胖有直接影响:跑台运动、自主转轮和游泳。在跑台运动方案开始时,大鼠以5 - 10米/分钟的速度在10分钟内完成低强度跑步<sup>[57]</sup>。大部分正式的训练是在跑台上以中或高强度进行短期或长期运动,速度范围为8 - 32米/分钟,坡度范围为0° - 10°(附表6)。一些研究还使用持续时间长的自主转轮运动的训练方法(附表6)。此外,一些研究对肥胖大鼠使用短期游泳(45分钟/天,5天/周)和抗阻运动干预(附表6)。

这些运动方案对治疗或预防肥胖都表现出积极的作用,在肥胖相关的信号通路中减轻体重、增加胰岛素敏感性和改善能量代谢。例如,在肥胖大鼠中,游泳减少肥胖和高胰岛素血症,抑制胰岛葡萄糖诱导的胰岛素分泌,恢复胰岛胰高血糖素样肽-1(GLP-1)对胰岛素的促进作用<sup>[58]</sup>。一次单独运动逆转了饮食诱导

肥胖大鼠的胰岛素敏感性,降低诱导型一氧化氮合酶(iNOS)的表达和胰岛素受体/胰岛素受体底物1/蛋白激酶B(IR/IRS1/Akt)的s-亚硝化,伴随腺苷酸(AMP)依赖的蛋白激酶(AMPK)活性的增加<sup>[59]</sup>。这些结果为运动中胰岛素敏感性恢复的机制提供了新视角。

**3.2.2 糖尿病** 糖尿病是一种由于胰岛素分泌和感觉功能受损导致的常见病<sup>[60]</sup>。糖尿病治疗通常包括药物治疗(例如二甲双胍、磺脲类药物、胰高血糖素样肽-1(GLP-1)类似物<sup>[61]</sup>)、能量限制和身体活动。此外,身体活动已被证明对提高生活质量具有积极的效果<sup>[62]</sup>。

本文确定了3种对糖尿病有直接效果的运动方法:跑台运动、自主转轮和游泳。在这些研究中,大多数大鼠模型是自发性的2型糖尿病大鼠(Otsuka long-Evans Tokushima Fatty),对其进行长时间的自主转轮(大鼠24小时自由使用转轮)(附表7)。一些研究还使用跑台和游泳作为训练方法,其中跑台运动以中等强度进行,速度为20米/分钟,大鼠被迫每天跑60分钟,持续12周<sup>[63]</sup>。此外,将长时间游泳设置为中等强度(附表7)。其中一项研究使用150分钟/周的游泳方案,另一项使用每周递增训练时间的方案。

这些运动方案对预防不同年龄的雄性自发性2型糖尿病大鼠糖尿病以及改善糖尿病大鼠的葡萄糖代谢和胰岛素抵抗性显示出积极的作用。经过3周中等强度的跑台运动后,1型糖尿病大鼠血清肿瘤坏死因子 $\alpha$ (TNF $\alpha$ )、细胞因子2 $\alpha$ / $\beta$ (CINC2 $\alpha$ / $\beta$ )、IL1 $\beta$ (白介素1 $\beta$ )、IL-6(白介素-6)、CRP(反应蛋白-C)和FFA(游离脂肪酸)水平明显低于静坐不动的大鼠<sup>[64-66]</sup>。中等强度运动可能通过减轻糖尿病大鼠的炎症反应改善代谢紊乱。

**3.2.3 糖尿病前期** 糖尿病前期即糖尿病的前兆,包括空腹血糖水平受损和糖耐量受损,只能通过高血糖水平诊断。糖尿病前期很难被诊断,美国内分泌学会(ACE)和美国临床内分泌医师学会(ACCE)提出了3种预防方法:健康饮食、减轻体重和身体活动。

在糖尿病前期(葡萄糖调节受损)的大鼠中,大多数运动方案采用跑台运动和自主转轮运动。跑台运动常以低、中或高强度进行短期或长期运动,速度范围为11 - 27米/分钟,坡度范围为0° - 15°(附表8)。一些研究中,在正式运动训练之前,老鼠要适应1 - 2周<sup>[67-70]</sup>(附表8)。自主转轮运动的持续时间从一次实验到长期,伴随持续12周的强制转轮训练。也有研究使用急性游泳的训练方法。

附表 8 所示结果与 Miranda 等人一致<sup>[71]</sup>,即耐力训练后胰岛素刺激的核糖体蛋白 S6 激酶 1(S6K1)的活性降低。运动训练增强骨骼肌胰岛素效应的机制之一一是腺苷酸活化蛋白激酶的慢性激活。腺苷酸活化蛋白激酶是一种已知的能量消耗型雷帕霉素靶蛋白信号通路的生理抑制剂。事实上,降低细胞内 ATP 水平或使用腺苷酸活化蛋白激酶激活剂 AICAR 的干预可降低雷帕霉素靶蛋白活化,证明核糖体蛋白 S6 激酶 1 磷酸化水平的降低。本文所述的运动方案提高腺苷酸活化蛋白激酶(Thr172 位点)的磷酸化水平,因而腺苷酸活化蛋白激酶激活可能是解释运动训练抑制雷帕霉素靶蛋白激活的机制之一。同时,雷帕霉素靶蛋白可能是治疗胰岛素抵抗的潜在目标。自主转轮运动在一定程度上通过抑制蛋白激酶 B 的一氧化氮合酶(iNOS)的表达和随后的亚硝化作用来改善胰岛素抵抗<sup>[72]</sup>。

**3.2.4 代谢综合征** 代谢综合征是指人体内蛋白质、脂肪、碳水化合物等物质代谢紊乱的病理状态。它包含一个复杂的代谢紊乱组,是糖尿病、心脑血管疾病的危险因素<sup>[73]</sup>。运动训练对改善代谢综合征有积极作用。

为了探讨代谢综合征中脂质代谢饮食诱导对大鼠肥胖的影响,使用肥胖 2 型糖尿病大鼠(ZDF)或自发性 2 型糖尿病大鼠进行代谢综合征的研究。运动训练主要在中、低强度的跑台上进行,以 10 - 30 米/分钟的速度和 0° - 15° 的坡度进行短期或长期训练(附表 9)。一些研究使用自主转轮的训练方法。在这些研究中,自主转轮训练主要应用于以长期为主的自由运动方式(附表 9)。此外,大鼠训练也采用 120 分钟/天、持续 4 周的游泳运动方式(附表 9)。

这些运动方案对代谢综合征的症状通常有积极的影响,如甘油三酯水平、脂质摄取、脂肪酸氧化和其他重要因素。然而,一项研究表明,急性运动并不影响肌肉的脂质摄取,反而导致肝脏脂质摄取的显著减少<sup>[74]</sup>。

**3.2.5 非酒精性脂肪肝** 非酒精性脂肪肝是多种代谢性疾病综合征的一种,包括肥胖、胰岛素抵抗、高脂血症和 2 型糖尿病(T2DM)<sup>[75,76]</sup>。有研究证明尽管对人们有许多其他治疗方法(如饮食、食物摄入频率和睡眠时间等生活习惯<sup>[77,78]</sup>),运动对非酒精性脂肪肝有显著的治疗作用。

在肥胖大鼠或自发性 2 型糖尿病大鼠模型中,治疗非酒精性脂肪肝最常用的方法是跑台运动和自主转轮运动。中等强度的长期跑台运动以 15 - 20 米/分钟的速度进行(附表 10)。在其他研究中,自主转轮训

练为期 4 周(附表 10)。

值得注意的是,所有的运动干预措施在预防和治疗非酒精性脂肪肝方面都取得了积极的效果。由于非酒精性脂肪肝的葡萄糖和脂质代谢紊乱,血糖水平不能维持在正常范围内。随着胰岛素含量的不断增加,其分泌功能和生理作用减弱,最终引发胰岛素抵抗,进一步加重病情<sup>[79]</sup>。研究表明,积极的运动可改善非酒精性脂肪肝大鼠的胰岛素或葡萄糖耐量和胰岛素敏感性,而高脂饮食则可以诱导胰岛素抵抗<sup>[80]</sup>。肝硬脂酰辅酶 A 去饱和酶-1(scd-1)能通过改善乙酰 C 骨关节炎羧化酶(ACC)活性,增加脂肪酸氧化,并将底物转化为脂肪酸分解来改善脂肪酸的异常分布。运动调节胰岛素的可能机制是通过激活 scd-1,然后调节雷帕霉素靶蛋白和甾醇调控元件结合蛋白-1c(SREBP-1c)介导的脂质生成<sup>[81]</sup>。此外,长期中等强度有氧运动可增加脂质代谢酶的活性,促进脂肪分解和脂质利用,从而防止脂质长期异位沉积<sup>[82]</sup>。

**3.3 心血管系统** 久坐的生活方式是人类心血管疾病的主要危险因素<sup>[15]</sup>。常见的心血管疾病包括心肌梗死(MI)、心肌肥厚、心肌损伤和动脉粥样硬化。体育锻炼被认为是心脏病患者康复的一部分,因为它可以降低心脏病风险,防止心肌损伤,改善心脏功能<sup>[83,84]</sup>。

**3.3.1 心肌梗死** 心肌梗死是由严重持续性缺血引起的冠状动脉阻塞、血流中断和部分心肌坏死综合征。心肌梗死后,心脏收缩功能减退,心肌结构受损(肥大、扩张)、细胞死亡、细胞外基质适应性重塑、能量代谢异常和细胞功能障碍所致的充盈受损<sup>[85]</sup>。

附表 11 显示,心肌梗死大鼠模型中的跑台运动和游泳是主要的训练方法。跑台运动主要为短期或长期,包括有氧运动运动强度低或中等(运动频率为 2 - 7 次/周)和高强度训练(运动频率为每周高强度训练 4 - 5 次)。游泳可作为一次性疲劳运动(其中不能使大鼠的头持续高于水面),或长期训练 5 - 6 次/周。此外,有时使用抗阻运动,并且包括 15 - 20 攀爬/节与 1 - 2 分钟的节间休息。对大鼠的实验通常是短期的,有时使用额外的 0% - 75% 体重负荷。游泳训练的持续时间为长期中强度或高强度。只有一项研究使用超过老鼠体重 3% 的负荷游泳(附表 11)。

总体而言,运动干预的效果是积极的。运动诱导心肌血管生成,减少梗死后左心室收缩功能恶化心力衰竭,减轻线粒体功能障碍。左心室(LV)功能的增加可能与氧化应激的减少有关,增加了心肌梗死后的抗氧化防御,促进心肌梗死大鼠血管生成。一些研究发

现,减少活性氧(ROS)的产生可能是运动训练介导有益于心肌梗死中的血管效应的一个重要机制。

心肌梗死通常伴有骨骼肌异常。间歇性运动训练、抗阻运动和中等强度持续有氧运动都可以通过增加骨骼肌抗氧化能力、减少氧化应激和蛋白质降解来逆转心肌梗死诱导的心功能不全和骨骼肌萎缩。成熟的脑源性神经营养因子(BDNF)是通过骨骼肌和左室非梗死区的运动训练诱导的,可能有助于改善心肌梗死后的肌肉和心脏功能<sup>[86]</sup>。另有研究发现,心肌梗死后不久进行运动训练可减轻心肌纤维化,维持心肌梗死后的心功能。游泳也有利于心肌梗死后的心脏重塑,因为游泳可以减轻心肌肥厚、减轻收缩和舒张功能障碍<sup>[87]</sup>。

3.3.2 中风 中风是残疾的主要原因,也是世界第三大死因;它引发了严重的并发症,对全社会造成了巨大的负担<sup>[88]</sup>。在许多动物实验中已经证实了运动的有效性,例如在大鼠实验中使用脑缺血模型<sup>[89]</sup>和跑台运动,证实可以减轻脑缺血后的神经元损伤<sup>[89]</sup>。

附表 12 显示,对大脑中动脉闭塞的大鼠主要采用的运动干预为跑台运动,且以低至中等或高强度以固定或 4 米/分钟递增至 30 米/分钟的速度进行短期(5 - 7 天/周)研究为主,仅确定 1 项长期研究。在正式运动训练开始之前,大鼠以 5 - 9 米/分钟的速度连续 2 - 3 天适应跑台装置。此外,在脑梗死模型中,对大鼠采用短期自主转轮运动和游泳干预。

这些运动方案对小脑卒中有积极作用。运动可以促进运动和认知功能的恢复,改善神经功能。一种可能的机制是通过细胞外信号调节激酶(ERK)信号途径促进海马内源性神经干细胞(NSCs)的增殖和分化,从而抑制神经元凋亡<sup>[90]</sup>。

运动预处理作为一种简单、临床可实施的预处理方法,具有潜在的神经保护作用。运动预处理的潜在机制可能与调节脑缺血再灌注损伤中 Toll 样受体 4/核转录因子 kappaB(TLR4/NF- $\kappa$ B)信号通路和抑制中枢和外周炎症级联反应有关<sup>[91]</sup>。运动预处理可以改善脑血流量,减少缺血时与血管生成相关的缺血区梗死体积<sup>[92,93]</sup>。通过细胞外调节蛋白激酶通路<sup>[94]</sup>改善血脑屏障功能障碍,通过 14-3-3 $\gamma$ /p- $\beta$ -连环蛋白磷酸化 Ser37/B 细胞淋巴瘤-2 相关 X 蛋白(Bax)/半胱天冬酶 3 抗凋亡通路减少缺血神经元死亡<sup>[95]</sup>。

3.3.3 心肌肥大 心肌肥大是指心肌增厚。心肌体积没有增加,有时甚至更小,但整个心脏看起来比正常大。心脏肥大的常见原因是心脏出口的狭窄,如主动

脉狭窄和高血压。运动可使病理性心肌肥大逆转为生理性心肌肥大<sup>[96]</sup>,其在心外膜产生大量新血管,同时也可引起心室肥大。血管完全能够应对心室心肌增厚。

如附表 13 所示,自发性高血压大鼠(SHR)高血压性心肌肥厚可导致病理性心脏重塑和心室功能障碍。对于自发性高血压大鼠,采用 5 次/周、长时间、中等强度的游泳训练方法。游泳可逆转病理性心肌肥大为生理性心肌肥大,增加活性醛类和受损蛋白的清除率,从而减少心肌氧化应激<sup>[97,98]</sup>。

3.3.4 心肌损伤 急性和慢性损伤心脏结构和功能的各种原因都会导致心肌细胞凋亡<sup>[99]</sup>,增加心肌炎症<sup>[100]</sup>和氧化应激<sup>[101]</sup>。

如附表 14 所示,研究大鼠心肌损伤的主要运动方案是跑台运动和自主转轮运动。跑台运动以短期和长期的高强度或中等强度进行,频率为 3 - 6 次/周。在正式运动方案之前,其中一项研究中的大鼠连续 12 天熟悉跑台。跑台速度逐渐增加,每 2 天增加 3 米/分钟,直到速度达到 18 米/分钟。最初的干预时间持续 5 分钟,且每天增加 5 分钟,直到达到 60 分钟<sup>[102]</sup>,而自主转轮运动通常在短期内进行。两种运动干预(跑台运动和自主转轮)的总体效果都是积极的。

使用长期中等强度的跑台运动有助于保护机体免受心肌损伤,这可有效减少心肌线粒体凋亡、心肌炎症、心肌水肿和纤维化,并增加胶原含量<sup>[103,104,105]</sup>。自主转轮运动也保护心脏免受伤害。其中的机制可能与基质金属蛋白酶-2(MMP-2)活性降低有关<sup>[106]</sup>。

3.3.5 动脉粥样硬化 动脉粥样硬化(AS)是一种病理状态,是心绞痛、心肌梗死和痉挛等几种重要血管有害事件发生的基础<sup>[107]</sup>,动脉粥样硬化是心脏病和中风的主要病因,其特征是脂质和纤维元素在动脉壁中积聚<sup>[108]</sup>,在动脉粥样硬化早期,胆固醇在几个动脉部位积聚,形成泡沫细胞;泡沫细胞促使动脉粥样硬化病变的生长。

如附表 15 所示,研究大鼠动脉粥样硬化的主要运动方案是游泳,干预时间长,强度低,频率为 5 次/周。对游泳的适应是在 1 周内通过运动时间逐渐增加(最初 5 分钟,然后每天延长 10 分钟,总共 60 分钟)来实现的<sup>[109]</sup>。在正式的运动干预中,运动时间从 10 分钟开始,每天以 10 分钟的幅度递增,并延长至每周 5 次、每次 30 - 60 分钟<sup>[110]</sup>。就整体效果而言,游泳可改善大鼠的血液循环、血脂水平和血管内皮细胞活性,也可作为动脉粥样硬化的抗炎治疗<sup>[111,112]</sup>。

3.3.6 高血压 高血压是一种以动脉压升高为特征

的全身性疾病,伴有功能性或器质性改变<sup>[113]</sup>,越来越多的证据表明,运动训练有利于高血压的治疗<sup>[114]</sup>。

如附表 16 所示,大鼠高血压研究的主要运动方法有跑台运动、自主转轮、抗阻运动和游泳。其中最常用的是跑台运动,通常在低、中、高强度下短期或长期进行,每周 5 - 7 次。自主转轮运动是短期或长期的,老鼠可以自由使用车轮。抗阻运动主要为短期或长期训练,急性训练强度为一次重复最大力量的 40% - 50% 负荷。一项长期研究的强度是递增的,使大鼠重复最大力量的 30% - 60% 进行 6 - 8 组爬梯<sup>[115]</sup>。通常而言,所有动物须熟悉运动器械 4 - 5 天。游泳研究的持续时间为短期或长期中等强度,运动频率为 5 - 7 次/周。大多数实验模型采用自发性高血压大鼠模型。

研究结果表明,适度的运动训练有利于左心肌线粒体适应,改善心血管自主神经平衡,降低血压,恢复冠状动脉的血管内皮功能。这可能与降低氧化应激有关<sup>[116,117]</sup>。此外,运动可以保护高血压患者的肾功能,不仅可以抑制高血压引起的肾皮质炎症和纤维化途径,保护线粒体功能,还能减轻肾脏的氧化应激<sup>[118]</sup>。一项研究表明,怀孕前和怀孕期间的运动训练可以缓解高血压、子宫胎盘灌注大鼠胎盘缺血引起的血管生成失衡和氧化应激<sup>[119]</sup>。

一项研究使用抗阻运动改善高血压大鼠内皮功能并降低静息血压。这可能与静息性心动过缓和训练后心交感神经张力降低有关。适度游泳还可减轻高血压引起的炎症和活性氧的形成,导致心脏重塑,调节高血压大鼠钙处理蛋白的表达,并通过增加抗氧化酶的表达预防内皮功能障碍<sup>[115]</sup>。

**3.3.7 心力衰竭** 心力衰竭是一个重要的公共卫生问题,发病率高、预测性差<sup>[120]</sup>。多项研究表明,运动对心力衰竭(HF)患者的心肌和交感神经活动正常化有积极的影响<sup>[121-123]</sup>,但其机制尚不清楚。

如附表 17 所示,用于大鼠心衰研究的主要运动方法有跑台运动、呼吸肌训练和抗阻运动。跑台运动短期和长期以低强度和中等强度进行,运动频率为 3 - 7 次/周。呼吸肌训练进行 6 周,5 天/周,30 分钟/天。在训练的第一周,将大鼠固定在硬性面罩上的吸气口进行呼吸训练,同时被限制在全身圆筒内。吸气口内径为 0.8 mm,2 周后逐渐减小至内径为 0.3 mm(最大阻力)<sup>[124]</sup>,采用蹲式装置对大鼠进行抗阻训练,通过表面电极对大鼠尾部施加电刺激促使大鼠反复伸展腿部并举起蹲式装置。为确定训练负荷,所有大鼠接受 1 次重复最大力量(1RM)实验。以 1RM 为最大重量,每两周调整一次。RT 程序是基于 8 周、3 次/周、每次

4 组、每组 6 - 8 次重复、强度为 75% - 85% 的 1RM 运动,并且两组间有 90 s 休息时间。所有接受训练的动物均接受深蹲训练,1 周内按体重的 40% - 60% 强度重复 5 - 10 次<sup>[125]</sup>,有氧运动训练可改善心力衰竭大鼠的炎症反应和心脏功能,减轻心脏重塑。运动训练减轻心力衰竭交感神经流出量升高的机制可能是通过室旁核(PVN)内血管紧张素能机制或谷氨酰胺能机制的正常化。慢性运动导致三磷酸腺苷(ATP)敏感性 k(KATP)通道上调可能对缺血性心力衰竭后的心脏功能有一定的调节作用。此外,运动与心肌线粒体细胞色素氧化酶活性增加和心磷脂(一种磷脂对线粒体能量代谢至关重要)的线粒体含量增加有关,证据表明运动可以通过保持线粒体能量代谢改善高血压的预测性工作<sup>[126,127]</sup>。

抗阻运动促进慢性心力衰竭大鼠心脏功能、力量获得、胶原沉积和炎症反应的改善。短程呼吸肌训练(RMT)有助于心力衰竭大鼠血流动力学、自主神经功能和衰减压力反应的适应<sup>[128]</sup>。

**3.4 神经系统** 神经系统包括中枢神经系统和外周神经系统,在调节人体的生理功能活动中起主导作用<sup>[129]</sup>。它是各种器官和系统各种生理过程相互联系、相互作用、密切配合的系统<sup>[130]</sup>,使人体成为一个完整统一的有机体,能够进行一切生命活动。

**3.4.1 帕金森病** 帕金森病(PD)是中老年人最常见的锥体外系疾病。帕金森病是一种常见的神经退行性疾病,包括运动和非运动症状。即使在病理确定的患者队列中,仍有一系列的临床特征、治疗反应和预后<sup>[131]</sup>。迄今为止,治疗帕金森病的主要方法是药物治疗,但近年来,运动疗法越来越被广泛使用<sup>[132]</sup>。

如附表 18 所示,只有一项探讨了大鼠的运动干预方法,即用帕金森病大鼠模型进行跑台运动<sup>[133]</sup>。该研究以成年雄性 Wistar 大鼠为研究对象,使用短期低强度运动,固定速度为 10 米/分钟,30 - 40 分钟/天。在干预前 1 天,让大鼠熟悉跑台装置。

跑台运动对帕金森大鼠毒素诱导的神经胶质细胞激活有积极的调节作用。运动可恢复纹状体细胞外信号调节激酶磷酸化的降低,表明运动可通过磷酸化保护运动性 6 - 羟多巴胺(6 - OHDA)诱导的细胞凋亡神经,使糖原合成酶激酶 3  $\beta$ (GSK3  $\beta$ )失活, I、II 型纤维横截面积明显恢复<sup>[133]</sup>。蛋白激酶 B 显著升高说明运动可恢复帕金森病所致的对侧比目鱼肌萎缩和多巴胺能神经元的丢失。

文献表明,每天 30 分钟的定速跑台运动能改善时空步态损伤,减轻神经炎症反应,提高皮质纹状体的步

行速度、多巴胺传递和突触可塑性。这可能是防治帕金森病的主要机制。

3.4.2 阿尔茨海默症 阿尔茨海默症是一种神经退行性疾病,是痴呆最常见的病因。临床特征表现为记忆障碍、失语症、识别能力丧失、视觉空间障碍、执行功能障碍以及人格和行为改变,目前阿尔茨海默症的病因仍未知。预计到2050年,将有1.36亿人受到痴呆症的影响,这将对全球健康和经济带来重大挑战。目前,尚无针对阿尔茨海默症的有效治疗。因此,阿尔茨海默症是神经系统疾病中急需的最大医疗空缺<sup>[134,135]</sup>。目前,阿尔茨海默症的治疗主要基于药物和饮食。运动疗法也逐渐成为阿尔茨海默症的一种治疗手段<sup>[136]</sup>。

在阿尔茨海默症大鼠模型中,主要的训练方法包括跑台运动和游泳(附表19)。最常用的锻炼方法是跑台运动。所有跑台运动的频率为每周5天,低强度进行<sup>[137]</sup>。研究人员让大鼠以10-15米/分钟的固定或增量速度在跑台上运动,治疗持续4周。在干预前,大鼠以约5米/分钟的速度熟悉跑台的运动程序。游泳也是治疗阿尔茨海默症的一种运动方法。在游泳研究中,游泳通常强度较低,运动时间有所不同。在一项研究中,大鼠每次仅游泳15分钟,而在另一项研究中,大鼠每次游泳10-60分钟。这些研究主要使用成年雄性Wistar或Sprague-Dawley大鼠进行实验。

跑台运动和游泳对阿尔茨海默症大鼠模型的神经源性神经营养因子的表达显示出积极作用,对下丘脑-垂体-肾上腺(HPA)轴的改变或淀粉样前体蛋白水平的增加均有积极作用。为期4周的跑台运动阻止了阿尔茨海默症诱导的钙调蛋白依赖的蛋白激酶IV(CaMKIV)水平下调,表明即使在A $\beta$ 1-42的毒性作用下,运动也可以维持正常的反应元件结合蛋白(CREB)磷酸化和完整的晚时相长时程增强作用(L-LTP)。Alkadhi等认为运动是一种有效的神经保护剂,可以通过上调神经源性神经营养因子来保护大脑神经免受过度伤害。

3.4.3 抑郁症 抑郁症的特征是持续情绪低落,是情绪障碍的主要类型。抑郁症是青少年中最普遍的精神疾病之一,且在成年人中常有发生<sup>[138]</sup>。尽管抑郁症治疗具有重要的研究意义,但仅有不到50%的抑郁症青少年得到了治疗<sup>[139]</sup>,这表明需要采取有效的预防抑郁症的措施,并予以广泛实施。抑郁症的治疗主要为药物疗法和认知疗法,但运动干预对抑郁症防治有积极作用<sup>[140]</sup>。

对于抑郁症大鼠的研究,主要训练手段包括跑台

和游泳(附表20)。在大多数研究中,跑台运动为短期干预,一般每周进行5天低强度训练<sup>[141]</sup>,速度为15-20米/分钟的固定或增量速度。另外,在正式运动训练前,大鼠连续5天熟悉装置。一些研究使用成年雄性Wistar或Sprague-Dawley大鼠进行短期的低强度游泳训练。

这些训练方法对海马体神经源性神经营养因子的表达具有积极作用<sup>[142]</sup>,还帮助保护白质中的毛细血管,改变下丘脑-垂体-肾上腺轴(HPA)并提高抑郁大鼠海马体的长期潜能。跑台运动可上调卒中后抑郁大鼠缺血海马区血清素1A(5-HT<sub>1A</sub>)受体水平,促进5-羟色胺(5-HT)合成,改善抑郁症状、海马神经发生和神经源性神经营养因子/神经源性神经营养因子前体(BDNF/proBDNF)比值。跑台运动也可能影响抑郁症的生物标志物<sup>[143]</sup>。

3.4.4 焦虑症 焦虑症也称为神经焦虑症,是神经症的最常见类型,其特征是紧张、担心和不安。焦虑症是儿童时期最常见的心理健康疾病(约占12%-20%)<sup>[144]</sup>。焦虑症与明显的功能障碍和寿命降低有关<sup>[145]</sup>,主要采用药物疗法,但运动也可以有效缓解焦虑症。

如附表21所示,焦虑症大鼠使用两种常见的运动训练方式。最常见的运动方法是在跑台上进行短期中等强度的运动,持续5-7天/周,固定或增量速度约为15米/分钟<sup>[146]</sup>。在开始运动训练之前,使用新生Wistar大鼠和雄性Sprague-Dawley大鼠,连续7天熟悉该运动。研究人员还使用成年雄性Sprague-Dawley大鼠,进行短期自由游泳训练。

这些训练方法对焦虑大鼠神经营养蛋白的表达具有积极作用。跑台等运动训练可减轻大鼠与焦虑反应有关的脑区域的氧化应激,可预防大鼠出现类似焦虑行为<sup>[147,148]</sup>。

3.4.5 神经性疼痛 神经性疼痛通常会对抗传统治疗,严重降低生活质量,并给社会带来沉重的经济负担。体育锻炼正成为遭受急性或慢性疼痛患者康复治疗的重要手段。锻炼可减轻各种类型的慢性疼痛,包括脊髓挫伤后的疼痛、下背部疼痛、慢性肌肉骨骼疼痛、I型复杂区域性疼痛综合征和非炎性慢性肌肉疼痛<sup>[149,150]</sup>。神经性疼痛通常采用手术治疗,但一项初步研究发现,运动疗法可用于治疗神经性疼痛。

附表22显示,只有一项研究使用大鼠模型研究运动训练与神经性疼痛之间的关系。该研究使用成年雄性Sprague-Dawley大鼠,干预方式为短期(连续4周),每周进行5天,每天10-60分钟自由游泳。在实

际的游泳训练前,大鼠接受了适应性训练。

游泳运动通常对神经性疼痛大鼠的神经营养蛋白表达具有积极作用。中低强度运动可通过调节神经胶质细胞的活性和同侧脊髓背角中脑源性神经营养因子的表达来减轻氧化应激并缓解神经痛。

3.4.6 神经损伤 神经系统是一种功能性调节系统,在人体中起着主导作用。一旦发生神经损伤,就会对身体的各部位产生影响。神经损伤包括显著神经元损伤、同步信号间障碍和脊髓损伤。

许多研究集中在运动与神经损伤之间的关系上。三种最常见的运动类型包括跑台运动、游泳和自主转轮(附表 23)。最常用的训练方法是跑台运动。这些研究的运动干预为短期(持续 4 - 6 周),每周 5 - 7 天以低强度或中等强度进行,固定或增量速度约为 15 - 25 米/分钟。在开始运动训练前,大鼠需要连续 3 天熟悉流程。

其他研究使用游泳作为训练方法,干预方式是短期的(连续 4 周),并且每周进行 5 天自由运动。其余研究使用自主转轮作为训练方法,在短期内以低强度进行。所有研究都使用成年雄性 Sprague - Dawley 和 Wistar 大鼠。

这些训练方法对调节神经损伤大鼠的 DNA 甲基化变化,增加神经胶质细胞源性的神经营养因子(GDNF)蛋白含量,诱导脑源性神经营养因子表达或降低大麻素受体 1(CB1)受体表达均表现出积极作用。身体活动促进皮质脊髓神经元的恢复,表明特异性疼痛的潜在原因。脑源性神经营养因子肌球蛋白相关激酶 B(TrkB)受体在异常纤维中表达。阻断 BDNF - TrkB 信号可以显著抑制异常。因此,脊髓损伤的早期康复可能通过 BDNF - TrkB 信号通路导致特异性疼痛。

3.4.7 外伤性脑损伤 在发展中国家和发达国家,脑损伤是致残甚至死亡的主要原因<sup>[151]</sup>。外伤性脑损伤(TBI)是由于脑部受到直接机械创伤而发生的,并导致中枢神经系统(CNS)退化和神经元细胞死亡<sup>[152]</sup>。

附表 24 显示,涉及 TBI 大鼠的研究中主要使用跑台运动和游泳。在跑台上以低强度至中等强度进行一次短期的运动训练,以固定或递增的速度每周进行 5 或 7 天(附表 24)。在正式实验前,让大鼠以 15 米/分钟的速度每天运动 15 分钟,连续 7 天适应跑台。两项研究使用游泳作为干预措施,持续时间包括短期和长期,每周运动 5 - 7 天,每天 20 分钟或 90 分钟。

研究结果显示运动对脑损伤治疗有积极作用。外伤性脑损伤后的运动可抑制受损区周围神经元变性和

凋亡细胞死亡,从而改善脑功能障碍<sup>[153]</sup>。

3.4.8 小脑共济失调 小脑性共济失调是一种遗传性和逐步退化性疾病<sup>[154]</sup>,全世界约有 263 万人受其影响。临床研究报告显示,药物治疗效果有限,但最新研究发现在跑台运动有显著益处<sup>[155]</sup>。

附表 25 显示,仅有两项涉及小脑性共济失调大鼠的研究。在跑台上以 15 米/分钟的固定速度和 10°的坡度进行低强度至中等强度的短期运动(附表 25)。

尽管这两项研究的数据还不足以确定,但似乎适度的运动可以延缓部分 sHW 大鼠的小脑功能障碍,从而延长其寿命并改善运动功能。

3.4.9 癫痫病 癫痫病是最常见的神经系统疾病之一,疗法的主要功能是减少过度兴奋从而预防癫痫发作,但这些疗法无法影响潜在的病理生理紊乱<sup>[156]</sup>。许多癫痫患者(PWE)都有广泛的认知问题,包括学习、记忆、注意力和执行控制能力<sup>[157]</sup>。这些认知缺陷导致生活质量下降与许多因素相关,包括癫痫的病因、反复发作和抗癫痫药的副作用,或是这些因素相互结合的作用。另有研究显示,身体活动对治疗癫痫有着积极的效果和研究性的支持。身体活动与癫痫认知之间的关系还需进一步研究<sup>[158]</sup>。

如附表 26 所示,在癫痫大鼠研究中最常用的运动方法是跑台运动。运动时间为 20 - 30 分钟/天,速度为 12 - 14 米/分钟,大多数适应性训练均以 10 米/分钟的速度和 0°坡度进行 10 分钟/天。与癫痫组相比,运动组中环磷酸腺苷(cAMP)反应元件结合蛋白的激活增加。

运动对癫痫患者大脑的有益作用可能部分与 BDNF - TrkB 信号通路相关蛋白质的激活有关<sup>[159]</sup>。适度的长期体育锻炼可以减少脑外伤引起的癫痫的发生率<sup>[160]</sup>。

3.4.10 自闭症 自闭症是发生在儿童时期一种神经系统疾病,其特征是社交和沟通障碍以及限制性和重复性行为。自闭症患者的小脑结构出现异常,包括颗粒和浦肯野细胞的丢失和萎缩,行为异常表现为运动障碍<sup>[161]</sup>。

如附表 27 所示,让年轻自闭症大鼠每天在跑台上运动 30 分钟,每周 5 次,持续 4 周。运动组的训练方案为前 5 分钟的速度为 2 米/分钟,后 5 分钟的速度为 5 米/分钟,后 20 分钟的速度为 8 米/分钟,所有运动没有倾斜角度。

Kim 等人<sup>[162]</sup>推测,自闭症大鼠小脑中 B 细胞淋巴瘤 - 2(Bcl - 2)的表达减少,而 Bcl - 2 相关 X 蛋白(Bax)的表达增加。相比之下,跑台运动会增加自闭

症幼鼠小脑中 Bcl-2 的表达,抑制 Bax 的表达并增加谷氨酸脱羧酶 67 (GAD67) 和细胞周期蛋白 D1 的表达。跑台运动还改善了年轻自闭症大鼠的运动功能障碍,其他机制尚不清楚。

**3.5 泌尿系统** 疾病可以发生在泌尿系统的器官(肾脏、输尿管、膀胱、尿道)中,并传播到整个系统。症状主要表现在泌尿系统本身,例如排尿变化、尿液变化、肿块和疼痛,但也可能出现其他症状,例如高血压、水肿和贫血。泌尿系统疾病也可能导致肾小球肾炎、尿石症和肾功能衰竭<sup>[163]</sup>。

**3.5.1 慢性肾脏病** 慢性肾脏病(CKD)患者的身体机能从疾病的早期就开始受到损害。受伤在慢性肾病患者中是一个关键的医学问题,因为患者体育活动的减少严重影响了其预后<sup>[164]</sup>。

附表 28 显示,在细胞外信号调节激酶大鼠研究中使用的主要运动方式是跑台运动,该运动通常在短期内以中等强度的稳定或递增的速度进行。所使用的适应方案为第 1 天:10 米/分钟 × 10 分钟;第 2 天:12.5 米/分钟 × 15 分钟;第 3 天:15 米/分钟 × 20 分钟,倾斜 5°;第 4 天:17 米/分钟 × 25 分钟,倾斜 10°;第 5 天:17 米/分钟 × 30 分钟,倾斜 15°。大多数跑台训练方案为 30 - 60 分钟/天,每周 5 天。

运动已被证明是治疗细胞外信号调节激酶患者的一种日益有效的方法,且有益身体健康、心血管健康并改善生活质量<sup>[165]</sup>。当前的国际指南建议细胞外信号调节激酶患者加入每天 30 分钟、每周 5 天适合健康的心血管功能改善计划<sup>[166]</sup>。

如附表 28 所示,适度运动有益于庆大霉素导致的急性肾损伤的恢复,可优化肾小管的恢复,并保护肾脏免受将来有毒药物以及衰老造成的侵害。推荐运动作为治疗成人细胞外信号调节激酶患者的肌肉萎缩的治疗方法<sup>[167]</sup>。

**3.6 癌症** 癌症起源于上皮组织的恶性肿瘤,是最常见的恶性肿瘤类型<sup>[168]</sup>。而起源于间质组织的恶性肿瘤统称为肉瘤。癌症的发生与吸烟、感染、职业暴露、环境污染、饮食不健康和遗传因素有关<sup>[169]</sup>。随着人类平均寿命的增加,癌症的威胁日益突出,这已成为中国城乡居民死亡的第一大原因。

**3.6.1 乳腺癌** 乳腺癌是最常见的癌症之一,且是发达国家女性第二大癌症死因<sup>[170]</sup>。乳腺癌的发病机理通常与遗传有关,严重影响甚至威胁了妇女的生命。乳腺癌常通过手术和化学疗法来治疗,运动也可以用作治疗和预防乳腺癌的方法<sup>[171]</sup>。

如附表 29 所示,在乳腺癌大鼠模型中主要使用跑

台运动、自主转轮和强制转轮运动的干预方法。跑台运动通常是短期的,强度为低或中等,每周运动 5 天<sup>[172,173]</sup>,固定或增量速度约为 20 米/分钟。自主转轮是短期的,通常以低强度进行,每周 7 天。另外,一些研究使用强制转轮运动作为训练方法,短期低强度,持续时间为 5 天/周。这些研究通常使用成年雌性 Sprague - Dawley 和 Wistar 大鼠。

这些运动方法通常显示出对预防乳腺癌的积极作用<sup>[174,175]</sup>。其机制可能包括预防肿瘤诱导的肿瘤坏死因子相关弱凋亡诱导因子/核转录因子 kappaB (TWEAK /NF -  $\kappa$ B) 信号传导、腺苷一磷酸 (AMP) 激活的蛋白激酶激活、雷帕霉素靶蛋白相关信号的下调和抑制致癌反应。

**3.6.2 结肠癌** 结肠癌是西欧和北美等发达国家最常见的恶性肿瘤,结肠癌的发病率和死亡率在中国也是最高的<sup>[176]</sup>。结肠癌的发病率与社会环境、生活方式和遗传因素有关,但确切原因尚不清楚。结肠癌通常需要手术和药物治疗,运动疗法也可用于结肠癌患者的治疗<sup>[177]</sup>。

附表 30 显示,在结肠癌大鼠模型中,主要训练方法包括游泳和自主转轮运动,其中游泳是最常用的运动方法。通常每周进行 5 天、低强度或中等强度的短期或长期自由运动。其中一项研究使用了在短期内以低强度进行的自主转轮运动。这些研究通常使用成年雄性 Wistar 大鼠进行研究。

这些运动方法可上调结肠癌大鼠癌细胞增殖、抗炎和腺苷酸活化蛋白激酶因子的表达<sup>[178]</sup>。

**3.6.3 其他癌症** 患有慢性疾病如感染性疾病和恶性肿瘤的患者通常会随着疾病的恶化而出现恶病质。恶病质的特征在于行为和代谢症状<sup>[179]</sup>。恶病质的严重程度随疾病和个体的不同而各异,因此很难加以定义和诊断。它通常伴随体内脂肪和肌肉的迅速恶化,这不仅影响患者的生活质量,还是提高患病率和死亡率的主要原因<sup>[180]</sup>。

附表 31 显示,在荷瘤大鼠模型中主要使用的运动方法包括跑台运动、游泳和抗阻训练(攀爬),运动方案为 8 周(每周 5 - 7 天)。如附表 31 所示,运动减少了肿瘤的存活面积,运动的动物表现出肿瘤细胞活性降低,肿瘤体积、肿瘤尺寸变小和体重增加的减少,这些研究中经常使用 Wistar 雄性大鼠。

这些结果表明运动可能调节肿瘤的生理和微环境,削弱其侵袭性。然而,运动对肿瘤的影响的分子机制尚不清楚。运动训练引起的能量消耗的增加,可以减少肿瘤生存所需的能量供应。总之,如果能量不足

(尤其是在糖酵解途径中)会影响肿瘤细胞的生长<sup>[181]</sup>。

#### 4 结 论

本研究总结了运动干预对6个系统(使用大鼠作为模型)中不同疾病的影响。本文所分析的运动种类和运动干预类型被证明可有效治疗疾病或改变信号通路。大鼠模型为研究人员提供了使用其他疾病模型的便利。例如,对于阿尔茨海默症(一种神经系统疾病),由于大鼠体积更大,组织和器官的观察条件更好,更易于收集和对其脑脊液进行分析,因此大鼠模型可能与人类阿尔茨海默症模型更相似。

综上所述,运动可以对大多数疾病产生积极影响,或者至少可以减轻疾病及其相应并发症。但是运动参数(例如运动时间和强度)可能有所不同。具体来说,长期运动(持续6周或更长时间)可能是治疗代谢和心血管系统疾病的最有效方法,而短期运动(持续少于6周)则可能更有利于治疗心理疾病。不同的运动强度也会导致不一样的结果,因此研究人员应认真选择适合的运动训练方案,以达到最佳的干预效果。本文旨在为大鼠模型运动干预的相关研究提供借鉴。为了更好地展示结果,表1总结了针对不同系统的运动干预方法。

同时,本文有以下需要改进之处:与使用小鼠模型的研究相比,使用转基因大鼠模型的研究通常更难开展,这在一定程度上阻碍了它们的使用范围以及影响结果的机制研究;本文所涉及的研究主要集中在干预方案对于疾病疗效影响上,而不是研究潜在的机制。因此,未来更应关注加快与大鼠模型有关的整个系统的开发,从而提供更有意义的结果并从这些研究中得出结论。

鉴于该研究领域的迅速发展,需要对该项研究进行适时更新,以补充运动对疾病治疗与预防之间关系的最新发现。

#### 参考文献

- [1] Krstrup P, Bangsbo J. Recreational football is effective in the treatment of non-communicable diseases. *Br J Sports Med* 2015;49:1426-7
- [2] Pedersen BK, Saltin B. Evidence for prescribing exercise as therapy in chronic disease. *Scand J Med Sci Sports* 2006; 16( Suppl. 1 ): 3-63. doi: 10. 1111/j. 1600-0838. 2006. 00520. x
- [3] Booth FW, Roberts CK, Laye MJ. Lack of exercise is a major cause of chronic diseases. *Compr Physiol* 2012;2: 1143-211
- [4] Williams PT, Thompson PD. Increased cardiovascular disease mortality associated with excessive exercise in heart attack survivors. *Mayo Clin Proc* 2014;89:1187-94
- [5] Silverberg D, Wexler D, Blum M, Schwartz D, Iaina A. The association between congestive heart failure and chronic renal disease. *Curr Opin Nephrol Hypertens* 2004; 13:163-70
- [6] Liu WY, He W, Li H. Exhaustive training increases uncoupling protein 2 expression and decreases Bcl-2/Bax ratio in rat skeletal muscle. *Oxid Med Cell Longev* 2013; 2013:780719. doi:10. 1155/2013/780719
- [7] Brusco CM, Blazeovich AJ, Rad aelli R, Botton CE, Cad ore EL, Baroni BM, et al. The effects of flexibility training on exercise-induced muscle damage in young men with limited hamstrings flexibility. *Scand J Med Sci Sports* 2018;28:1671-80
- [8] Dores H, de Araujo Goncalves P, Cardim N, Neuparth N. Coronary artery disease in athletes: An adverse effect of intense exercise? *Rev Port Cardiol* 2018;37:77-85
- [9] Qiu Z, Zheng K, Zhang H, Feng J, Wang L, Zhou H. Physical Exercise and Patients with Chronic Renal Failure: A Meta-Analysis. *Biomed Res Int* 2017; 2017:7191826. doi:10. 1155/2017/7191826
- [10] Astrogiovanni P, Di Rosa M, Ravalli S, Castorina A, Guglielmino C, Imbesi R, et al. Moderate physical activity as a prevention method for knee osteoarthritis and the role of synoviocytes as biological key. *Int J Mol Sci* 2019;20: E511. doi:10. 3390/ijms20030511
- [11] Abreu P, Mendes SV, Ceccatto VM, Hirabara SM. Satellite cell activation induced by aerobic muscle adaptation in response to endurance exercise in humans and rodents. *Life Sci* 2017;170:33-40
- [12] Yang Q, Huang G, Tian Q, Liu W, Sun X, Li N, et al. " Living High-Training Low " improved weight loss and glucagon-like peptide-1 level in a 4-week weight loss program in adolescents with obesity: A pilot study. *Medicine ( Baltimore)* 2018;97:e9943. doi:10. 1097/MD. 00000000000009943
- [13] Patterson CM, Levin BE. Role of exercise in the central regulation of energy homeostasis and in the prevention of obesity. *Neuroendocrinology* 2008;87:65-70
- [14] Archer AE, Von Schulze AT, Geiger PC. Exercise, heat shock proteins and insulin resistance. *Philos Trans R Soc Lond B Biol Sci* 2018;373:20160529. doi:10. 1098/rstb. 2016. 0529
- [15] Lavie CJ, Arena R, Swift DL, Johannsen NM, Sui X, Lee DC, et al. Exercise and the cardiovascular system: clinical science and cardiovascular outcomes. *Circ Res* 2015;117: 207-19

- [16] Sturgeon KM, B Ky, JR Libonati, KH Schmitz. The effects of exercise on cardiovascular outcomes before, during, and after treatment for breast cancer. *Breast Cancer Res Treat* 2014;143:219-26
- [17] Edwards KM, Wilson KL, Sadjia J, Ziegler MG, Mills PJ. Effects on blood pressure and autonomic nervous system function of a 12-week exercise or exercise plus DASH-diet intervention in individuals with elevated blood pressure. *Acta Physiol (Oxf)* 2011;203:343-50
- [18] Eyre H, Baune BT. Neuroimmunological effects of physical exercise in depression. *Brain Behav Immun* 2012; 26: 251-66
- [19] Atkinson CL, Lewis NC, Carter HH, Thijssen DH, Ainslie PN, Green DJ. Impact of sympathetic nervous system activity on post-exercise flow-mediated dilatation in humans. *J Physiol* 2016;593:5145-56
- [20] Di Luigi L, Romanelli F, Sgrò P, Lenzi A. Andrological aspects of physical exercise and sport medicine. *Endocrine* 2012;42:278-84
- [21] Moraska A, T Deak, RL Spencer, D Roth, M Fleshner. Treadmill running produces both positive and negative physiological adaptations in Sprague-Dawley rats. *Am J Physiol Regul Integr Comp Physiol* 2000;279:R1321-9.
- [22] Kramer K, Dijkstra H, Bast A. Control of physical exercise of rats in a swimming basin. *Physiol Behav* 1993;53:271-6
- [23] Dankel SJ, Mattocks KT, Mouser JG, Buckner SL, Jessee MB, Loenneke JP. A critical review of the current evidence examining whether resistance training improves time trial performance. *J Sports Sci* 2018;36:1485-91
- [24] Kahn C, Line S. *Musculoskeletal system introduction: introduction*. Kenilworth, NJ ;Merck & Co;2008
- [25] Kjobsted R, Hingst JR, Fentz J, Foretz M, Sanz MN, Pehmoller C, et al. AMPK in skeletal muscle function and metabolism. *FASEB J* 2018;32:1741-77
- [26] Bodine SC, Baehr LM. Skeletal muscle atrophy and the E3 ubiquitin ligases MuRF1 and MAFbx/atrogin-1. *Am J Physiol Endocrinol Metab* 2015; 307: E469-84. doi: 10.1152/ajpendo.00204.2014
- [27] Jung HJ, Lee KP, Milholland B, Shin YJ, Kang JS, Kwon KS, et al. Comprehensive miRNA Profiling of Skeletal Muscle and Serum in Induced and Normal Mouse Muscle Atrophy During Aging. *J Gerontol A Biol Sci Med Sci* 2017;72:1483-91
- [28] Qiu J, Fang Q, Xu T, Wu C, Xu L, Wang L, et al. Mechanistic Role of Reactive Oxygen Species and Therapeutic Potential of Antioxidants in Denervation- or Fasting-Induced Skeletal Muscle Atrophy. *Front Physiol* 2018;9:215. doi:10.3389/fphys.2018.00215
- [29] Kong X, Yao T, Zhou P, Kazak L, Tenen D, Lyubetskaya A, et al. Brown Adipose Tissue Controls Skeletal Muscle Function via the Secretion of Myostatin. *Cell Metab* 2018; 28:631-43. e3. doi:10.1016/j.cmet.2018.07.004
- [30] Saeman MR, DeSpain K, Liu MM, Carlson BA, Song J, Baer LA, et al. Effects of exercise on soleus in severe burn and muscle disuse atrophy. *J Surg Res* 2015;198:19-26
- [31] Krug AL, Macedo AG, Zago AS, Rush JW, Santos CF, Amaral SL. High-intensity resistance training attenuates dexamethasone-induced muscle atrophy. *Muscle Nerve* 2016;53:779-88
- [32] Järvinen TA, Järvinen TL, Kääriäinen M, Äärimaa V, Vaittinen S, Kalimo H, et al. Muscle injuries: optimising recovery. *Best Pract Res Clin Rheumatol* 2007;21:317-31
- [33] Valle X, Malliaropoulos N, Parraga Botero JD, Bikos G, Pruna R, Monaco M, et al. Hamstring and other thigh injuries in children and young athletes. *Scand J Med Sci Sports* 2018;28:2630-7
- [34] Rahusen FT, Weinhold PS, Almekinders LC. Nonsteroidal anti-inflammatory drugs and acetaminophen in the treatment of an acute muscle injury. *Am J Sports Med* 2004;32:1856-9
- [35] Morais SR, Goya AG, Urias U, Jannig PR, Bacurau AV, Mello WG, et al. Strength training prior to muscle injury potentiates low-level laser therapy ( LLLT )-induced muscle regeneration. *Lasers Med Sci* 2017;32:317-25
- [36] Nourissat G, Berenbaum F, Duprez D. Tendon injury: from biology to tendon repair. *Nat Rev Rheumatol* 2015;11:223-33
- [37] Echigo R, Fujita A, Nishimura R, Mochizuki M. Triceps brachii tendon injury in four Pomeranians. *J Vet Med Sci* 2018;80:772-7
- [38] Marqueti RC, Durigan JLQ, Oliveira AJS, Mekaro MS, Guzzoni V, Aro AA, et al. Effects of aging and resistance training in rat tendon remodeling. *FASEB J* 2018; 32: 353-68
- [39] Wu Y, Xie L, Wang M, Xiong Q, Guo Y, Liang Y, et al. Mett13-mediated m(6)A RNA methylation regulates the fate of bone marrow mesenchymal stem cells and osteoporosis. *Nat Commun* 2018; 9: 4772. doi: 10.1038/s41467-018-06898-4
- [40] Ramin C, May BJ, Roden RBS, Orellana MM, Hogan BC, McCullough MS, et al. Evaluation of osteopenia and osteoporosis in younger breast cancer survivors compared with cancer-free women: a prospective cohort study. *Breast Cancer Res* 2018; 20: 134. doi: 10.1186/s13058-018-1061-4
- [41] Papageorgiou M, Sathyapalan T, Schutte R. Muscle mass measures and incident osteoporosis in a large cohort of postmenopausal women. *J Cachexia Sarcopenia Muscle*

- 2019;10:131-9
- [42] Bae S, Park MS, Han JW, Kim YJ. Correlation between pain and degenerative bony changes on cone-beam computed tomography images of temporomandibular joints. *Maxillofac Plast Reconstr Surg* 2017;39:19. doi: 10.1186/s40902-017-0117-1
- [43] Liu Q, Niu J, Huang J, Ke Y, Tang X, Wu X, et al. Knee osteoarthritis and all-cause mortality: the Wuchuan Osteoarthritis Study. *Osteoarthritis Cartilage* 2015; 23: 1154-7
- [44] Metzger CE, K Baek, Swift SN, De Souza MJ, Bloomfield SA. Exercise during energy restriction mitigates bone loss but not alterations in estrogen status or metabolic hormones. *Osteoporos Int* 2016;27:2755-64
- [45] Yanagihara GR, Paiva AG, Gasparini GA, Macedo AP, Frighetto PD, Volpon JB, et al. High-impact exercise in rats prior to and during suspension can prevent bone loss. *Braz J Med Biol Res* 2016; 49: S0100-879X2016000300605. doi:10.1590/1414-431X20155086
- [46] Li MH, Xiao R, Li JB, Zhu Q. Regenerative approaches for cartilage repair in the treatment of osteoarthritis. *Osteoarthritis Cartilage* 2017;25:1577-87
- [47] Pichler K, Loreto C, Leonardi R, Reuber T, Weinberg AM, Musumeci G. RANKL is downregulated in bone cells by physical activity (treadmill and vibration stimulation training) in rat with glucocorticoid-induced osteoporosis. *Histol Histopathol* 2013;28:1185-96
- [48] Szychlinska MA, Castrogiovanni P, Trovato FM, Nsir H, Zarrouk M, Lo Furno D, et al. Physical activity and Mediterranean diet based on olive tree phenolic compounds from two different geographical areas have protective effects on early osteoarthritis, muscle atrophy and hepatic steatosis. *Eur J Nutr* 2019;58:565-81
- [49] Yang Y, Wang Y, Kong Y, Zhang X, Zhang H, Gang Y, et al. The therapeutic effects of lipoxin A4 during treadmill exercise on monosodium iodoacetate-induced osteoarthritis in rats. *Mol Immunol* 2018;103:35-45
- [50] Assis L, Almeida T, Milares LP, dos Passos N, Araujo B, Bublitz C, et al. Musculoskeletal Atrophy in an Experimental Model of Knee Osteoarthritis: The Effects of Exercise Training and Low-Level Laser Therapy. *Am J Phys Med Rehabil* 2015;94:609-16
- [51] Cormier J, Cone K, Lanpher J, Kinens A, Henderson T, Liaw L, et al. Exercise reverses pain-related weight asymmetry and differentially modulates trabecular bone microarchitecture in a rat model of osteoarthritis. *Life Sci* 2017;180:51-9
- [52] Safdar A, Saleem A, Tarnopolsky MA. The potential of endurance exercise-derived exosomes to treat metabolic diseases. *Nat Rev Endocrinol* 2016;12:504-17
- [53] Goodpaster BH, Sparks LM. Metabolic Flexibility in Health and Disease. *Cell Metab* 2017;25:1027-36
- [54] Haslam DW, James WP. Obesity. *the Lancet* 2005; 366: 1197-209
- [55] Poirier P, Giles TD, Bray GA, Hong Y, Stern JS, Pi-Sunyer FX, et al. Obesity and cardiovascular disease: pathophysiology, evaluation, and effect of weight loss: an update of the 1997 American Heart Association Scientific Statement on Obesity and Heart Disease from the Obesity Committee of the Council on Nutrition, Physical Activity, and Metabolism. *Circulation* 2006;113:898-918
- [56] Bojanowska E, Ciosek J. Can we selectively reduce appetite for energy-dense foods? An overview of pharmacological strategies for modification of food preference behavior. *Curr Neuropharmacol* 2016; 14: 118-42
- [57] Giles ED, Steig AJ, Jackman MR, Higgins JA, Johnson GC, Lindstrom RC, et al. Exercise decreases lipogenic gene expression in adipose tissue and alters adipocyte cellularity during weight regain after weight loss. *Front Physiol* 2016; 7:32. doi:10.3389/fphys.2016.00032
- [58] Svidnicki PV, de Carvalho Leite N, Venturelli AC, Camargo RL, Vicari MR, de Almeida MC, et al. Swim training restores glucagon-like peptide-1 insulinotropic action in pancreatic islets from monosodium glutamate-obese rats. *Acta Physiol (Oxf)* 2013;209:34-44
- [59] Pauli JR, Ropelle ER, Cintra DE, Carvalho-Filho MA, Moraes JC, De Souza CT, et al. Acute physical exercise reverses S-nitrosation of the insulin receptor, insulin receptor substrate 1 and protein kinase B/Akt in diet-induced obese Wistar rats. *J Physiol* 2008;586:659-71
- [60] Plas M, Rotteveel E, Izaks GJ, Spikman JM, van der Wal-Huisman H, van Etten B, et al. Cognitive decline after major oncological surgery in the elderly. *Eur J Cancer* 2017;86:394-402
- [61] Kleinberger JW, Pollin TI. Personalized medicine in diabetes mellitus: current opportunities and future prospects. *Ann N Y AcadSci* 2015;1346:45-56
- [62] Perry BD, Caldwell MK, Brennan-Speranza TC, Sbaraglia M, Jerums G, Garnham A, et al. Muscle atrophy in patients with Type 2 Diabetes Mellitus: roles of inflammatory pathways, physical activity and exercise. *Exerc Immunol Rev* 2016;22:94-109
- [63] Machado MV, Martins RL, Borges J, Antunes BR, Estado V, Vieira AB, et al. Exercise training reverses structural microvascular rarefaction and improves endothelium-dependent microvascular reactivity in rats with diabetes. *Metab Syndr Relat Disord* 2016;14:298-304

- [64] Yoon H, Thakur V, Isham D, Fayad M, Chattopadhyay M. Moderate exercise training attenuates inflammatory mediators in DRG of Type 1 diabetic rats. *Exp Neurol* 2015;267:107-14
- [65] Kim JS, Lee YH, Kim JC, Ko YH, Yoon CS, Yi HK. Effect of exercise training of different intensities on anti-inflammatory reaction in streptozotocin-induced diabetic rats. *Biol Sport* 2014;31:73-9
- [66] Nazem F, Farhangi N, Neshat-Gharamaleki M. Beneficial effects of endurance exercise with rosmarinus officinalis labiatae leaves extract on blood antioxidant enzyme activities and lipid peroxidation in streptozotocin-induced diabetic rats. *Can J Diabetes* 2015;39:229-34
- [67] Alaca N, Uslu S, Gulec Suyen G, Ince U, Serteser M, Kurtel H. Effects of different aerobic exercise frequencies on streptozotocin-nicotinamide-induced type 2 diabetic rats; continuous versus short bouts and weekend warrior exercises. *J Diabetes* 2018;10:73-84
- [68] Cartee GD, Arias EB, Yu CS, Pataky MW. Novel single skeletal muscle fiber analysis reveals a fiber type-selective effect of acute exercise on glucose uptake. *Am J Physiol Endocrinol Metab* 2016;311:E818-E24
- [69] Funai K, Schweitzer GG, Castorena CM, Kanzaki M, Cartee GD. In vivo exercise followed by in vitro contraction additively elevates subsequent insulin-stimulated glucose transport by rat skeletal muscle. *Am J Physiol Endocrinol Metab* 2010;298:E999-1010
- [70] Monaco CMF, Proudfoot R, Miotto PM, Herbst EAF, MacPherson REK, Holloway GP.  $\alpha$ -linolenic acid supplementation prevents exercise-induced improvements in white adipose tissue mitochondrial bioenergetics and whole-body glucose homeostasis in obese Zucker rats. *Diabetologia* 2018;61:433-44
- [71] Miranda L, Horman S, De Potter I, Hue L, Jensen J, Rider MH. Effects of contraction and insulin on protein synthesis, AMP-activated protein kinase and phosphorylation state of translation factors in rat skeletal muscle. *Pflugers Arch* 2008;455:1129-40
- [72] Tsuzuki T, Shinozaki S, Nakamoto H, Kaneki M, Goto S, Shimokado K, et al. Voluntary exercise can ameliorate insulin resistance by reducing inos-mediated s-nitrosylation of akt in the liver in obese rats. *PLoS One* 2015; 10: e0132029. doi:10.1371/journal.pone.0132029
- [73] Ponziani FR, Pecere S, Gasbarrini A, Ojetti V. Physiology and pathophysiology of liver lipid metabolism. *Expert Rev Gastroenterol Hepatol* 2015;9:1055-67
- [74] Janssens S, Jonkers RA, Groen AK, Nicolay K, van Loon LJ, Prompers JJ. Effects of acute exercise on lipid content and dietary lipid uptake in liver and skeletal muscle of lean and diabetic rats. *Am J Physiol Endocrinol Metab* 2015; 309:E874-83. doi:10.1152/ajpendo.00292.2015
- [75] Clark JM, Diehl AM. Nonalcoholic fatty liver disease: an underrecognized cause of cryptogenic cirrhosis. *JAMA* 2003;289:3000-4
- [76] Neuschwander-Tetri BA. Non-alcoholic fatty liver disease. *BMC Med* 2017;15:45. doi:10.1186/s12916-017-0806-8
- [77] Trovato FM, Martines GF, Brischetto D, Catalano D, Musumeci G, Trovato GM. Fatty liver disease and lifestyle in youngsters: diet, food intake frequency, exercise, sleep shortage and fashion. *Liver Int* 2016;36:427-33
- [78] Trovato FM, Castrogiovanni P, Szychlinska MA, Purrello F, Musumeci G. Early effects of high-fat diet, extra-virgin olive oil and vitamin D in a sedentary rat model of non-alcoholic fatty liver disease. *Histol Histopathol* 2018; 33: 1201-13
- [79] Kapravelou G, Martinez R, Nebot E, Lopez-Jurado M, Aranda P, Arrebola F, et al. The combined intervention with germinated vigna radiata and aerobic interval training protocol is an effective strategy for the treatment of non-alcoholic fatty liver disease (NAFLD) and other alterations related to the metabolic syndrome in Zucker rats. *Nutrients* 2017;9:E774. doi:10.3390/nu9070774
- [80] Sheldon RD, Nicole Blaize A, Fletcher JA, Pearson KJ, Donkin SS, Newcomer SC, et al. Gestational exercise protects adult male offspring from high-fat diet-induced hepatic steatosis. *J Hepatol* 2016;64:171-8
- [81] Rector RS, Uptergrove GM, Morris EM, Borengasser SJ, Laughlin MH, Booth FW, et al. Daily exercise vs. caloric restriction for prevention of nonalcoholic fatty liver disease in the OLETF rat model. *Am J Physiol Gastrointest Liver Physiol* 2011;300:G874-83
- [82] Linden MA, Sheldon RD, Meers GM, Ortinau LC, Morris EM, Booth FW, et al. Aerobic exercise training in the treatment of non-alcoholic fatty liver disease related fibrosis. *J Physiol* 2016;594:5271-84
- [83] Gielen S, Laughlin MH, OConner C, Duncker DJ. Exercise training in patients with heart disease; review of beneficial effects and clinical recommendations. *Prog Cardiovasc Dis* 2015;57:347-55
- [84] Lucchetti BFC, Zanluqui NG, de Ataide Raquel H, Lovomartins MI, Tatakijara VLH, de Oliveira Belem M, et al. Moderate treadmill exercise training improves cardiovascular and nitrenergic response and resistance to trypanosoma cruzi infection in mice. *Front Physiol* 2017; 8:315. doi:10.3389/fphys.2017.00315
- [85] Chistiakov DA, Orekhov AN, Bobryshev YV. Cardiac-specific miRNA in cardiogenesis, heart function, and cardiac pathology (with focus on myocardial infarction). *J*

- Mol Cell Cardiol* 2016;94:107-21
- [86] Musumeci G, Trovato FM, Pichler K, Weinberg AM, Loreto C, Castrogiovanni P. Extra-virgin olive oil diet and mild physical activity prevent cartilage degeneration in an osteoarthritis model; an in vivo and in vitro study on lubricin expression. *J Nutr Biochem* 2013;24:2064-75
- [87] Lee HW, Ahmad M, Wang HW, Leenen FH. Effects of exercise training on brain-derived neurotrophic factor in skeletal muscle and heart of rats post myocardial infarction. *Exp Physiol* 2017;102:314-28
- [88] Yang G, Wang Y, Zeng Y, Gao GF, Liang X, Zhou M, et al. Rapid health transition in China, 1990-2010: findings from the Global Burden of Disease Study 2010. *The Lancet* 2013;381:1987-2015
- [89] Stradecki-Cohan HM, Youbi M, Cohan CH, Saul I, Garvin AA, Perez E, et al. Physical exercise improves cognitive outcomes in 2 models of transient cerebral ischemia. *Stroke* 2017;48:2306-9
- [90] Liu W, Wu W, Lin G, Cheng J, Zeng Y, Shi Y. Physical exercise promotes proliferation and differentiation of endogenous neural stem cells via ERK in rats with cerebral infarction. *Mol Med Rep* 2018;18:1455-64
- [91] Zhu L, Ye T, Tang Q, Wang Y, Wu X, Li H, et al. Exercise preconditioning regulates the toll-like receptor 4/nuclear factor-kappaB signaling pathway and reduces cerebral ischemia/reperfusion inflammatory injury: a study in rats. *J Stroke Cerebrovasc Dis* 2016;25:2770-9
- [92] Wang X, Zhang M, Yang SD, Li WB, Ren SQ, Zhang J, et al. Pre-ischemic treadmill training alleviates brain damage via GLT-1-mediated signal pathway after ischemic stroke in rats. *Neuroscience* 2014;274:393-402
- [93] Zhang P, Yu H, Zhou N, Zhang J, Wu Y, Zhang Y, et al. Early exercise improves cerebral blood flow through increased angiogenesis in experimental stroke rat model. *J Neuroeng Rehabil* 2013;10:43. doi: 10.1186/1743-0003-10-43
- [94] Guo M, Lin V, Davis W, Huang T, Carranza A, Sprague S, et al. Preischemic induction of TNF-alpha by physical exercise reduces blood-brain barrier dysfunction in stroke. *J Cereb Blood Flow Metab* 2008;28:1422-30
- [95] Otsuka S, Sakakima H, Terashi T, Takada S, Nakanishi K, Kikuchi K. Preconditioning exercise reduces brain damage and neuronal apoptosis through enhanced endogenous 14-3-3gamma after focal brain ischemia in rats. *Brain Struct Funct* 2019;224:727-38
- [96] Gibb AA, Epstein PN, Uchida S, Zheng Y, McNally LA, Obal D, et al. Exercise-Induced Changes in Glucose Metabolism Promote Physiologic Cardiac Growth. *Circulation* 2017;136:2144-57
- [97] Garcarena CD, Pinilla OA, Nolly MB, Laguens RP, Escudero EM, Cingolani HE, et al. Endurance training in the spontaneously hypertensive rat: conversion of pathological into physiological cardiac hypertrophy. *Hypertension* 2009;53:708-14
- [98] Campos JC, Fernandes T, Bechara LR, da Paixao NA, Brum PC, de Oliveira EM, et al. Increased clearance of reactive aldehydes and damaged proteins in hypertension-induced compensated cardiac hypertrophy: impact of exercise training. *Oxid Med Cell Longev* 2015;2015:464195. doi:10.1155/2015/464195
- [99] Booi HG, Yu H, De Boer RA, van de Kolk CW, van de Sluis B, Van Deursen JM, et al. Overexpression of A kinase interacting protein 1 attenuates myocardial ischaemia/reperfusion injury but does not influence heart failure development. *Cardiovasc Res* 2016;111:217-26
- [100] Hartupee J, Mann DL. Role of inflammatory cells in fibroblast activation. *J Mol Cell Cardiol* 2016;93:143-8
- [101] Dong W, Zhou M, Dong M, Pan B, Liu Y, Shao J, et al. Keto acid metabolites of branched-chain amino acids inhibit oxidative stress-induced necrosis and attenuate myocardial ischemia-reperfusion injury. *J Mol Cell Cardiol* 2016;101:90-8
- [102] Serra AJ, Higuchi ML, Ihara SS, Antonio EL, Santos MH, Bombig MT, et al. Exercise training prevents beta-adrenergic hyperactivity-induced myocardial hypertrophy and lesions. *Eur J Heart Fail* 2008;10:534-9
- [103] Peterson JM, Bryner RW, Amy S, Frisbee JC, Alway SE. Mitochondrial apoptotic signaling is elevated in cardiac but not skeletal muscle in the obese Zucker rat and is reduced with aerobic exercise. *J Appl Physiol* (1985) 2008;105:1934
- [104] Huang CY, Lin YY, Hsu CC, Cheng SM, Shyu WC, Ting H, et al. Anti-apoptotic Effect of Exercise Training on Ovariectomized Rat Hearts. *J Appl Physiol* (1985) 2016;121:457-65
- [105] Serra AJ, Higuchi ML, Ihara SS, Antônio EL, Santos MH, Bombig MT, et al. Exercise training prevents beta-adrenergic hyperactivity-induced myocardial hypertrophy and lesions. *Eur J Heart Fail* 2008;10:534-9
- [106] Pósa A, SzabóR, Kupai K, Baráth Z, Szalai Z, Csonka A, et al. Cardioprotective effects of voluntary exercise in a rat model; role of matrix metalloproteinase-2. *Oxid Med Cell Longev* 2015;2015:876805. doi:10.1155/2015/876805
- [107] Ishii M, Kaikita K, Sato K, Yamanaga K, Miyazaki T, Akasaka T, et al. Impact of Statin Therapy on Clinical Outcome in Patients With Coronary Spasm. *J Am Heart Assoc* 2016;5:e003426. doi:10.1161/JAHA.116.003426
- [108] Bartels ED, Christoffersen C, Lindholm MW, Nielsen LB.

- Altered metabolism of LDL in the arterial wall precedes atherosclerosis regression. *Circ Res* 2015;117:933
- [109] Lee J, Cho JY, Kim WK. Anti-inflammation effect of exercise and Korean red ginseng in aging model rats with diet-induced atherosclerosis. *Nutr Res Pract* 2014; 8; 284-91
- [110] Wang J, Wang L, Yang H, You Y, Xu H, Gong L, et al. Prevention of atherosclerosis by Yindan Xinnaotong capsule combined with swimming in rats. *BMC Complement Altern Med* 2015; 15; 109. doi: 10.1186/s12906-015-0622-7
- [111] Lee J, Cho JY, Kim WK. Anti-inflammation effect of Exercise and Korean red ginseng in aging model rats with diet-induced atherosclerosis. *Nutr Res Pract* 2014; 8; 284-91
- [112] Wang J, Wang L, Yang H, You Y, Xu H, Gong L, et al. Prevention of atherosclerosis by Yindan Xinnaotong capsule combined with swimming in rats. *BMC Complement Altern Med* 2015; 15; 109. doi: 10.1186/s12906-015-0622-7
- [113] Xing CY, Tarumi T, Meijers RL, Turner M, Repshas J, Xiong L, et al. Arterial Pressure, Heart Rate, and Cerebral Hemodynamics Across the Adult Life Span. *Hypertension* 2017;69:712-20
- [114] Cornelissen VA, Smart NA. Exercise training for blood pressure: a systematic review and meta-analysis. *J Am Heart Assoc.* 2013; 2; e004473. doi: 10.1161/JAHA.112.004473
- [115] Faria TO, JK Angeli, LGM Mello, GC Pinto, I Stefanon, DV Vassallo, et al. A Single Resistance Exercise Session Improves Aortic Endothelial Function in Hypertensive Rats. *Arq Bras Cardiol* 2017;108:228-36
- [116] Sousa LE, Magalhaes WG, Bezerra FS, Santos RA, Campagnole-Santos MJ, Isoldi MC, et al. Exercise training restores oxidative stress and nitric oxide synthases in the rostral ventrolateral medulla of renovascular hypertensive rats. *Free Radic Res* 2015;49:1335-43
- [117] Roque FR, Briones AM, Garcia-Redondo AB, Galan M, Martinez-Revelles S, Avendano MS, et al. Aerobic exercise reduces oxidative stress and improves vascular changes of small mesenteric and coronary arteries in hypertension. *Br J Pharmacol* 2013;168:686-703
- [118] Gu Q, Zhao L, Ma YP, Liu JD. Contribution of mitochondrial function to exercise-induced attenuation of renal dysfunction in spontaneously hypertensive rats. *Mol Cell Biochem* 2015;406:217-25
- [119] Rocha R, Peracoli JC, Volpato GT, Damasceno DC, Campos KE. Effect of exercise on the maternal outcome in pregnancy of spontaneously hypertensive rats. *Acta Cir Bras* 2014;29:553-9
- [120] Mozaffarian D, Benjamin EJ, Go AS, Arnett DK, Blaha MJ, Cushman M, et al. Heart disease and stroke statistics--2015 update: a report from the American Heart Association. *Circulation* 2015;131:e29-322. doi:10.1161/CIR.000000000000152
- [121] Haykowsky MJ, Liang Y, Pechter D, Jones LW, McAlister FA, Clark AM. A meta-analysis of the effect of exercise training on left ventricular remodeling in heart failure patients; the benefit depends on the type of training performed. *J Am Coll Cardiol* 2007;49:2329-36
- [122] Souza RW, Fernandez GJ, Cunha JP, Piedade WP, Soares LC, Souza PA, et al. Regulation of cardiac microRNAs induced by aerobic exercise training during heart failure. *Am J Physiol Heart Circ Physiol* 2015;309:H1629-41.
- [123] Zheng H, Sharma NM, Liu X, Patel KP. Exercise training normalizes enhanced sympathetic activation from the paraventricular nucleus in chronic heart failure; role of angiotensin II. *Am J Physiol Regul Integr Comp Physiol* 2012;303:R387-94. doi:10.1152/ajpregu.00046.2012
- [124] Jaenisch RB, Quagliotto E, Chechi C, Calegari L, Dos Santos F, Borghi-Silva A, et al. Respiratory Muscle Training Improves Chemoreflex Response, Heart Rate Variability, and Respiratory Mechanics in Rats With Heart Failure. *The Can J Cardiol* 2017;33:508-14
- [125] Andrews Portes L, Magalhaes Saraiva R, Alberta Dos Santos A, Tucci PJ. Swimming training attenuates remodeling, contractile dysfunction and congestive heart failure in rats with moderate and large myocardial infarctions. *Clin Exp Pharmacol Physiol* 2009;36:394-9
- [126] Alves JP, Nunes RB, Stefani GP, Dal Lago P. Resistance training improves hemodynamic function, collagen deposition and inflammatory profiles; experimental model of heart failure. *PLoS One* 2014;9:e110317. doi:10.1371/journal.pone.0110317
- [127] Chicco AJ, McCune SA, Emter CA, Sparagna GC, Rees ML, Bolden DA, et al. Low-intensity exercise training delays heart failure and improves survival in female hypertensive heart failure rats. *Hypertension* 2008; 51; 1096-102
- [128] Alves JP, Nunes RB, Ferreira DDC, Stefani GP, Jaenisch RB, Lago PD. High-intensity resistance training alone or combined with aerobic training improves strength, heart function and collagen in rats with heart failure. *Am J Transl Res* 2017;9:5432-41
- [129] Ito K, Takizawa T. Nuclear architecture in the nervous system: development, function, and neurodevelopmental diseases. *Front Genet* 2018; 9; 308. doi: 10.3389/fgene.2018.00308

- [130] Klimovich AV, Bosch TCG. Rethinking the role of the nervous system; lessons from the hydra holobiont. *Bioessays* 2018; 40; e1800060. doi: 10. 1002/bies. 201800060
- [131] Poewe W, Seppi K, Tanner CM, Halliday GM, Brundin P, Volkman J, et al. Parkinson disease. *Nat Rev Dis Primers* 2017;3;17013. doi:10. 1038/nrdp. 2017. 13
- [132] Ahlskog JE. Does vigorous exercise have a neuroprotective effect in Parkinson disease? *Neurology* 2011;77:288-94
- [133] Choe MA, Koo BS, An GJ, Jeon S. Effects of treadmill exercise on the recovery of dopaminergic neuron loss and muscle atrophy in the 6-ohda lesioned parkinson's disease rat model. *Korean J Physiol Pharmacol* 2012;16:305-12
- [134] Gaugler J, James B, Johnson T, Scholz K, Weuve J. 2016 Alzheimer's disease facts and figures. *Alzheimers Dement* 2016;12:459-509
- [135] Martin C. Alzheimer's disease; strategies for disease modification. *Nat Rev Drug Discov* 2010;9:387-98
- [136] Ryan SM, Kelly AM. Exercise as a pro-cognitive, pro-neurogenic and anti-inflammatory intervention in transgenic mouse models of Alzheimer's disease. *Ageing Res Rev* 2016;27:77-92
- [137] Ozbeyli D, Sari G, Ozkan N, Karademir B, Yuksel M, Cilingir Kaya OT, et al. Protective effects of different exercise modalities in an Alzheimer's disease-like model. *Behav Brain Res* 2017;328:159-77
- [138] Waszczuk MA, Zavos HM, Gregory AM, Eley TC. The phenotypic and genetic structure of depression and anxiety disorder symptoms in childhood, adolescence, and young adulthood. *JAMA Psychiatry* 2014;71:905-16
- [139] Kessler RC, Avenevoli S, Ries Merikangas K. Mood disorders in children and adolescents; an epidemiologic perspective. *Biol Psychiatry* 2001;49:1002-14
- [140] Lavie CJ, Milani RV, O'Keefe JH, Lavie TJ. Impact of exercise training on psychological risk factors. *Prog Cardiovasc Dis* 2011;53:464-70
- [141] Luo L, Li C, Deng Y, Wang Y, Meng P, Wang Q. High-intensity interval training on neuroplasticity, balance between brain-derived neurotrophic factor and precursor brain-derived neurotrophic factor in poststroke depression rats. *J Stroke Cerebrovasc Dis* 2019;28:672-82
- [142] Luo L, Li C, Du X, Shi Q, Huang Q, Xu X, et al. Effect of aerobic exercise on BDNF/proBDNF expression in the ischemic hippocampus and depression recovery of rats after stroke. *Behav Brain Res* 2019;362:323-31
- [143] Hodosy J, Ostatnikova D, Caganova M, Kovacsova M, Mikulajova M, Guller L, et al. Physical activity induces depression-like behavior in intact male rats. *Pharmacol Biochem Behav* 2012;101:85-7
- [144] Achenbach TM, Howell CT, McConaughy SH, Stanger C. Six-year predictors of problems in a national sample of children and youth; I. Cross-informant syndromes. *J Am Acad Child Adolesc Psychiatry* 1995;34:336-47
- [145] Perez DL, Williams B, Matin N, Jr LFW, Costumero-Ramos V, Fricchione GL, et al. Corticolimbic structural alterations linked to health status and trait anxiety in functional neurological disorder. *J Neurol Neurosurg Psychiatry* 2017;88:1052-9
- [146] Salim S, Sarraj N, Taneja M, Saha K, Tejada-Simon MV, Chugh G. Moderate treadmill exercise prevents oxidative stress-induced anxiety-like behavior in rats. *Behav Brain Res* 2010;208:545-52
- [147] Sciolino NR, Dishman RK, Holmes PV. Voluntary exercise offers anxiolytic potential and amplifies galanin gene expression in the locus coeruleus of the rat. *Behav Brain Res* 2012;233:191-200
- [148] Hill LE, Droste SK, Nutt DJ, Linthorst AC, Reul JM. Voluntary exercise alters GABA(A) receptor subunit and glutamic acid decarboxylase-67 gene expression in the rat forebrain. *J Psychopharmacol* 2010;24:745-56
- [149] Cohen SP, Hooten WM. Advances in the diagnosis and management of neck pain. *BMJ* 2017;358:j3221. doi:10. 1136/bmj. j3221
- [150] Grace PM, Fabisiak TJ, Green-Fulgham SM, Anderson ND, Strand KA, Kwilasz AJ, et al. Prior voluntary wheel running attenuates neuropathic pain. *Pain* 2016; 157: 2012-23
- [151] Pak ME, Jung DH, Lee HJ, Shin MJ, Kim SY, Shin YB, et al. Combined therapy involving electroacupuncture and treadmill exercise attenuates demyelination in the corpus callosum by stimulating oligodendrogenesis in a rat model of neonatal hypoxia-ischemia. *Exp Neurol* 2018; 300: 222-31
- [152] Sanches EF, Duran-Carabali LE, Tosta A, Nicola F, Schmitz F, Rodrigues A, et al. Pregnancy swimming causes short- and long-term neuroprotection against hypoxia-ischemia in very immature rats. *Pediatr Res* 2017; 82: 544-53
- [153] Itoh T, Imano M, Nishida S, Tsubaki M, Hashimoto S, Ito A, et al. Exercise inhibits neuronal apoptosis and improves cerebral function following rat traumatic brain injury. *J Neural Transm (Vienna)* 2011;118:1263-72
- [154] Selvadurai LP, Harding IH, Corben LA, Georgiou-Karistianis N. Cerebral abnormalities in friedreich ataxia; a review. *Neurosci Biobehav Rev* 2017;84:394-406
- [155] Vasudevan EV, Glass RN, Packel AT. Effects of traumatic brain injury on locomotor adaptation. *J Neurol Phys Ther* 2014;38:172-82

- [156] Pimentel J, Tojal R, Morgado J. Epilepsy and physical exercise. *Seizure* 2015;25:87-94
- [157] Hodges SL, Lugo JN. Wnt/beta-catenin signaling as a potential target for novel epilepsy therapies. *Epilepsy Res* 2018;146:9-16
- [158] Allendorfer JB, Arida RM. Role of Physical Activity and Exercise in Alleviating Cognitive Impairment in People With Epilepsy. *Clin Ther* 2018;40:26-34
- [159] de Almeida AA, Gomes da Silva S, Lopim GM, Vannucci Campos D, Fernandes J, Cabral FR, et al. Physical exercise alters the activation of downstream proteins related to BDNF-TrkB signaling in male Wistar rats with epilepsy. *J Neurosci Res* 2018;96:911-20
- [160] Setkowicz Z, Kosonowska E, Kaczynska M, Gzielo-Jurek K, Janeczko K. Physical training decreases susceptibility to pilocarpine-induced seizures in the injured rat brain. *Brain Res* 2016;1642:20-32
- [161] Vernazza-Martin S, Martin N, Vernazza A, Lepellec-Muller A, Rufo M, Massion J, et al. Goal directed locomotion and balance control in autistic children. *J Autism Dev Disord* 2005;35:91-102
- [162] Kim JE, Shin MS, Seo TB, Ji ES, Baek SS, Lee SJ, et al. Treadmill exercise ameliorates motor disturbance through inhibition of apoptosis in the cerebellum of valproic acid-induced autistic rat pups. *Mol Med Rep* 2013;8:327-34
- [163] Okamura T, Hashimoto Y, Hamaguchi M, Obora A, Kojima T, Fukui M. Triglyceride-glucose index is a predictor of incident chronic kidney disease: a population-based longitudinal study. *Clin Exp Nephrol* 2019; 23: 948-955
- [164] Tamaki M, Miyashita K, Wakino S, Mitsuiishi M, Hayashi K, Itoh H. Chronic kidney disease reduces muscle mitochondria and exercise endurance and its exacerbation by dietary protein through inactivation of pyruvate dehydrogenase. *Kidney Int* 2014;85:1330-9
- [165] Clarke AL, Young HM, Hull KL, Hudson N, Burton JO, Smith AC. Motivations and barriers to exercise in chronic kidney disease: a qualitative study. *Nephrol Dial Transplant* 2015;30:1885-92
- [166] Howden EJ, Coombes JS, Isbel NM. The role of exercise training in the management of chronic kidney disease. *Curr Opin Nephrol Hypertens* 2015;24:480-7
- [167] Chen Y, Sood S, Biada J, Roth R, Rabkin R. Increased workload fully activates the blunted IRS-1/PI3-kinase/Akt signaling pathway in atrophied uremic muscle. *Kidney Int* 2008;73:848-55
- [168] Torre LA, Islami F, Siegel RL, Ward EM, Jemal A. Global cancer in women: burden and trends. *Cancer Epidemiol Biomarkers Prev* 2017;26:444-57
- [169] Smith RA, Andrews K, Brooks D, DeSantis CE, Fedewa SA, Lortet-Tieulent J, et al. Cancer screening in the United States, 2016: a review of current American Cancer Society guidelines and current issues in cancer screening. *CA Cancer J Clin* 2016;66:96-114
- [170] Ferlay J, Soerjomataram I, Dikshit R, Eser S, Mathers C, Rebelo M, et al. Cancer incidence and mortality worldwide: sources, methods and major patterns in GLOBOCAN 2012. *Int J Cancer* 2015;136:E359-86.
- [171] Schmidt ME, Joachim W, Petra A, Andreas S, Ulrich CM, Karen S. Effects of resistance exercise on fatigue and quality of life in breast cancer patients undergoing adjuvant chemotherapy: a randomized controlled trial. *Int J Cancer* 2015;137:471-80
- [172] Faustino-Rocha AI, Gama A, Oliveira PA, Vanderperren K, Saunders JH, Pires MJ, et al. A contrast-enhanced ultrasonographic study about the impact of long-term exercise training on mammary tumor vascularization. *J Ultrasound Med* 2017;36:2459-66
- [173] Faustino-Rocha AI, Silva A, Gabriel J, Gil da Costa RM, Moutinho M, Oliveira PA, et al. Long-term exercise training as a modulator of mammary cancer vascularization. *Biomed Pharmacother* 2016;81:273-80
- [174] Wang M, Yu B, Westerlind K, Strange R, Khan G, Patil D, et al. Prepubertal physical activity up-regulates estrogen receptor beta, BRCA1 and p53 mRNA expression in the rat mammary gland. *Breast Cancer Res Treat* 2009; 115: 213-20
- [175] Malicka I, Siewierska K, Pula B, Kobierzycki C, Haus D, Paslawska U, et al. The effect of physical training on the N-methyl-N-nitrosourea-induced mammary carcinogenesis of Sprague-Dawley rats. *Exp Biol Med (Maywood)* 2015; 240:1408-15
- [176] Brenner H, Kloor M, Pox CP. Colorectal cancer. *The Lancet* 2014;383:1490-502
- [177] Brown JC, Winters-Stone K, Lee A, Schmitz KH. Cancer, physical activity, and exercise. *Compr Physiol* 2012; 2: 2775-809
- [178] Demarzo MM, Martins LV, Fernandes CR, Herrero FA, Perez SE, Turatti A, et al. Exercise reduces inflammation and cell proliferation in rat colon carcinogenesis. *Med Sci Sports Exerc* 2008;40:618-21
- [179] Huang S, Hendriks W, Althage A, Hemmi S, Bluethmann H, Kamijo R, et al. Immune response in mice that lack the interferon-gamma receptor. *Science* 1993;259:1742-5
- [180] Baazim H, Schweiger M, Moschinger M, Xu H, Scherer T, Popa A, et al. CD8 ( + ) T cells induce cachexia during chronic viral infection. *Nat Immunol* 2019;20:701-10
- [181] Padilha CS, Testa MT, Marinello PC, Cella PS, Voltarelli

表 1 大鼠不同系统的运动干预建议

**Table 1 The suggested exercise interventions for different systems in rats**

| System                     | Exercise method          | Exercise protocols                                                                                                                                                                         |                              |                 |                                                    |
|----------------------------|--------------------------|--------------------------------------------------------------------------------------------------------------------------------------------------------------------------------------------|------------------------------|-----------------|----------------------------------------------------|
|                            |                          | Adaptive training                                                                                                                                                                          | Duration                     | Frequency       | Intensity                                          |
| Motor                      | Treadmill exercise       | Consecutive 1 - 2 weeks, 15 min/day                                                                                                                                                        | 4 - 8 weeks                  | 5 days/week     | 60 min/day, 10 - 20 m/min                          |
| Metabolic                  | Treadmill exercise       | Consecutive 1 - 2 weeks                                                                                                                                                                    | 8 - 10 weeks                 | 5 - 7 days/week | 60 min/day, 20 - 25 m/min                          |
| Cardio - cerebral vascular | Treadmill exercise       | 5 - 9 m/min, increased 1 m/min every day, 2 - 3 days                                                                                                                                       | 4 - 8 weeks                  | 5 days/week     | 60 min/day, 50% - 60% of maximal exercise capacity |
| Nervous                    | Treadmill exercise       | Consecutive 3 - 7 days                                                                                                                                                                     | 4 - 8 weeks/<br>6 - 8 months | 5 days/week     | 30 min/day, 10 - 22m/min                           |
| Urinary                    | Treadmill exercise       | Day 1: 1.0 - 10.0 m/min × 10 min; Day 2: 12.5 m/min × 15 min; Day 3: 15.0 m/min × 20 min with 5° incline; Day 4: 17.0 m/min × 25 min, 10° incline; Day 5: 17.0 m/min × 30 min, 15° incline | 4 - 6 weeks                  | 5 days/week     | 30 - 60 min/day, 16 - 17m/min                      |
| Cancer                     | Treadmill exercise       | Consecutive 3 - 5 days                                                                                                                                                                     | 8 - 12 weeks/35 weeks        | 5 days/week     | 60 min/day, 20 m/min                               |
|                            | Voluntary wheel exercise | Consecutive 2 - 3 days                                                                                                                                                                     | 4 - 6 weeks                  | 7 days/week     | free to exercise                                   |
